# Supplementary material for: DNA Backbone Sulfur-Modification Expands Microbial Growth Range under Multiple Stresses by its anti-oxidation function
Source: PubMed Central journal article supplement (PMC5471199; doi:10.1038/s41598-017-02445-1), 2017-06-14
Supplement: 41598_2017_2445_MOESM1_ESM.pdf [file 41598_2017_2445_MOESM1_ESM.pdf]

# **DNA Backbone Sulfur-Modification Expands Microbial Growth Range under Multiple Stresses by its anti-oxidation function**

**Authors:** Yan Yang<sup>1†</sup>, Guanpeng Xu<sup>1†</sup>, Jingdan Liang<sup>1†</sup>, Ying He<sup>1</sup>, Lei Xiong<sup>1</sup>, Hui Li<sup>2</sup>, Douglas Bartlett<sup>3</sup>, Zixin Deng<sup>1</sup>, Zhijun Wang<sup>1\*</sup>, and Xiang Xiao<sup>1\*</sup>

## **Affiliations:**

<sup>1</sup>State Key Laboratory of Microbial Metabolism, School of Life Science and Biotechnology, Shanghai Jiao Tong University, Shanghai, People's Republic of China.

<sup>2</sup>Central Analytical lab, School of Chemistry and Chemical Engineering, Shanghai Jiao Tong University, Shanghai, People's Republic of China.

<sup>3</sup>Center for Marine Biotechnology and Biomedicine, Scripps Institution of Oceanography, University of California, San Diego, La Jolla, CA, USA.

\*Corresponding author. E-mail: wangzhijun@sjtu.edu.cn; xoxiang@sjtu.edu.cn.

†These authors contributed equally to this work.

## Supplementary Materials

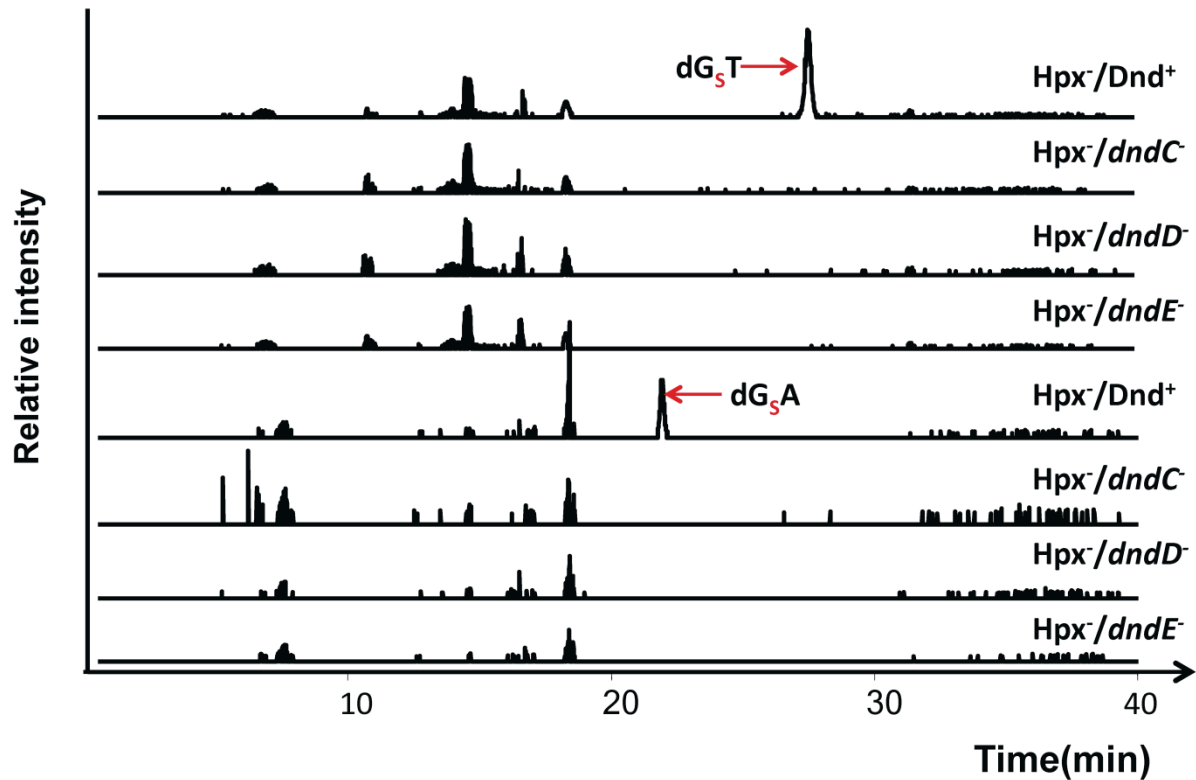

### Supplementary Fig. 1.

PT modification detection in the Hpx<sup>-</sup>/Dnd strains. The Hpx<sup>-</sup> mutant was transformed using plasmids containing the *dnd* gene cluster (Dnd<sup>+</sup>) or the corresponding *dnd* gene in-frame deletion mutants (*dndC*<sup>-</sup> - *dndE*<sup>-</sup>), resulting in *dnd* gene derivatives of Hpx<sup>-</sup> (Hpx<sup>-</sup>/Dnd<sup>+</sup>, Hpx<sup>-</sup>/*dndC*<sup>-</sup>-*dndE*<sup>-</sup>). PT-linked dinucleotides were detected in the hydrolysate of Hpx<sup>-</sup>/Dnd<sup>+</sup> genome DNA but not in the hydrolysate of Hpx<sup>-</sup>/Dnd<sup>-</sup> genome DNA.

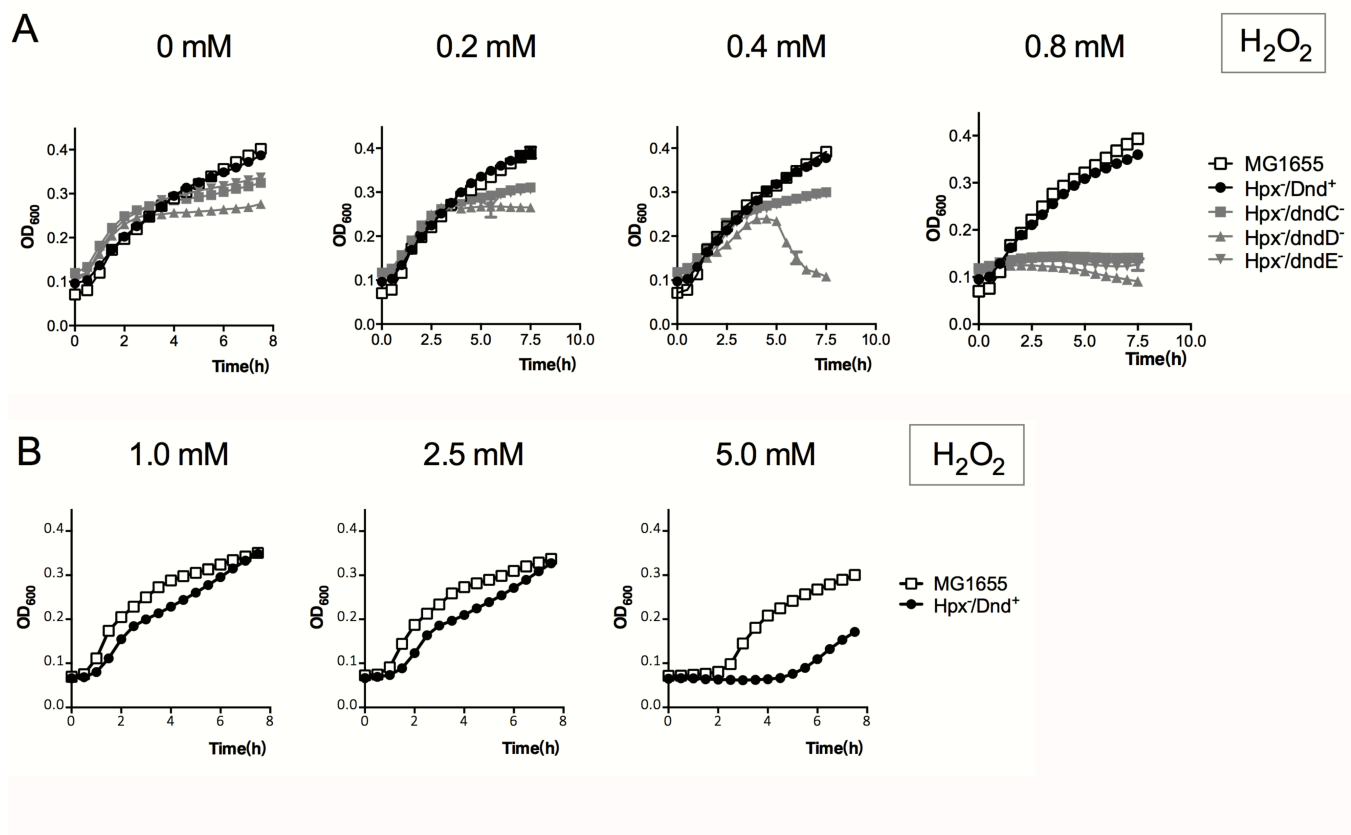

### Supplementary Fig. 2

DNA PT modification restores the antioxidation capability of the *E. coli*  $\text{Hpx}^-$  mutant. **(A)** The cells were treated with 0, 0.2, 0.4, and 0.8 mM  $\text{H}_2\text{O}_2$ , and cell growth was monitored. **(B)**  $\text{Hpx}^-/\text{Dnd}^+$  and the wild-type *E. coli* strain MG1655 were treated with increasing concentrations of  $\text{H}_2\text{O}_2$ . The growth of the strains was assessed at  $\text{OD}_{600}$ . The data shown represent the results of three independent experiments, and the error bars indicate the standard deviations.

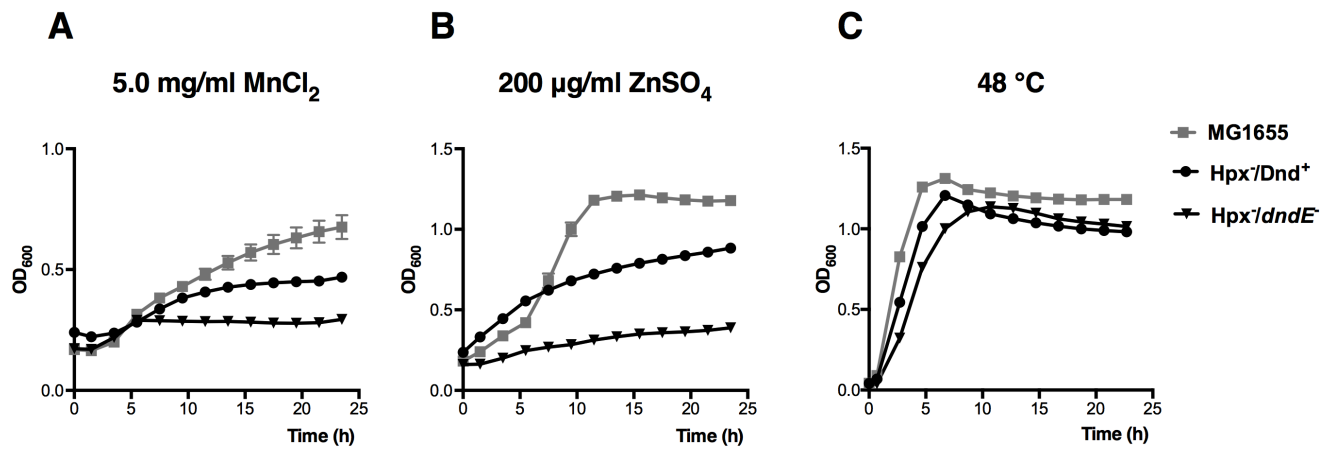

### Supplementary Fig. 3

Growth of *E. coli* PT strains under different stress conditions. Hpx<sup>-</sup>/Dnd<sup>+</sup>, the wild-type *E. coli* strain MG1655, and Hpx<sup>-</sup>/dndE<sup>-</sup> were grown under different MnCl<sub>2</sub>/ZnSO<sub>4</sub>/ high temperature stress conditions, and cell growth was monitored. The growth of the strains was detected at OD<sub>600nm</sub>. The data shown represent the results of three independent experiments, and the error bars indicate the standard deviations.

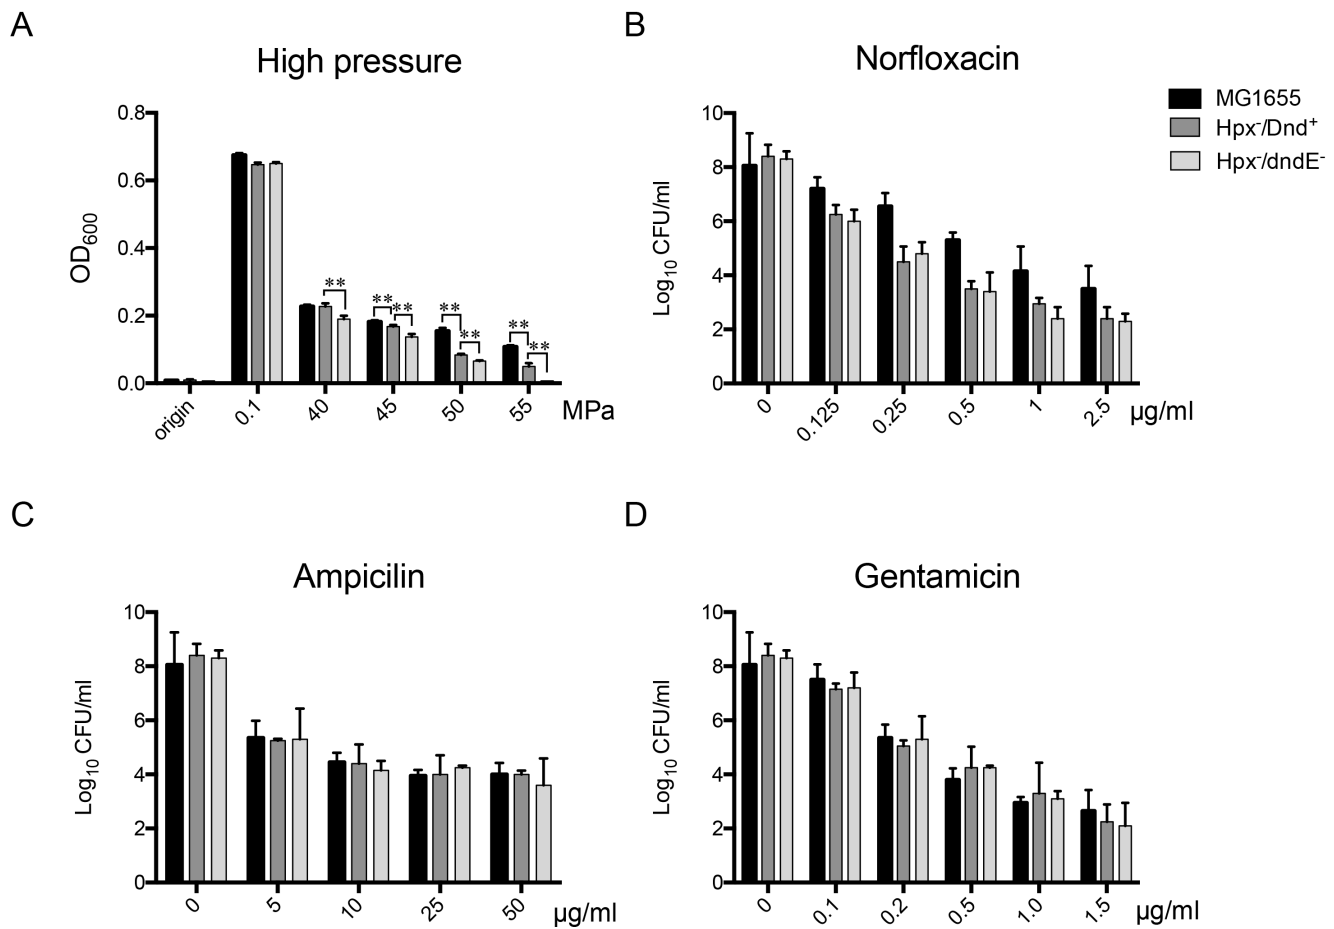

#### Supplementary Fig. 4

Maximum growth at high pressures and antibiotic killing efficacy of *E. coli* PT strains. (A) Hpx<sup>-</sup>/Dnd<sup>+</sup>, the wild-type *E. coli* strain MG1655, and Hpx<sup>-</sup>/dndE<sup>-</sup> were grown at different high pressures for 48 hours, and the growth of the strains was assessed at OD<sub>600</sub>. (B-D) Colony count after different concentrations of antibiotic treatment. The data shown represent the results of three independent experiments, and the error bars indicate the standard deviations. The data were analyzed by Student's t test. \*\*, P < 0.01; ns, not significantly different.

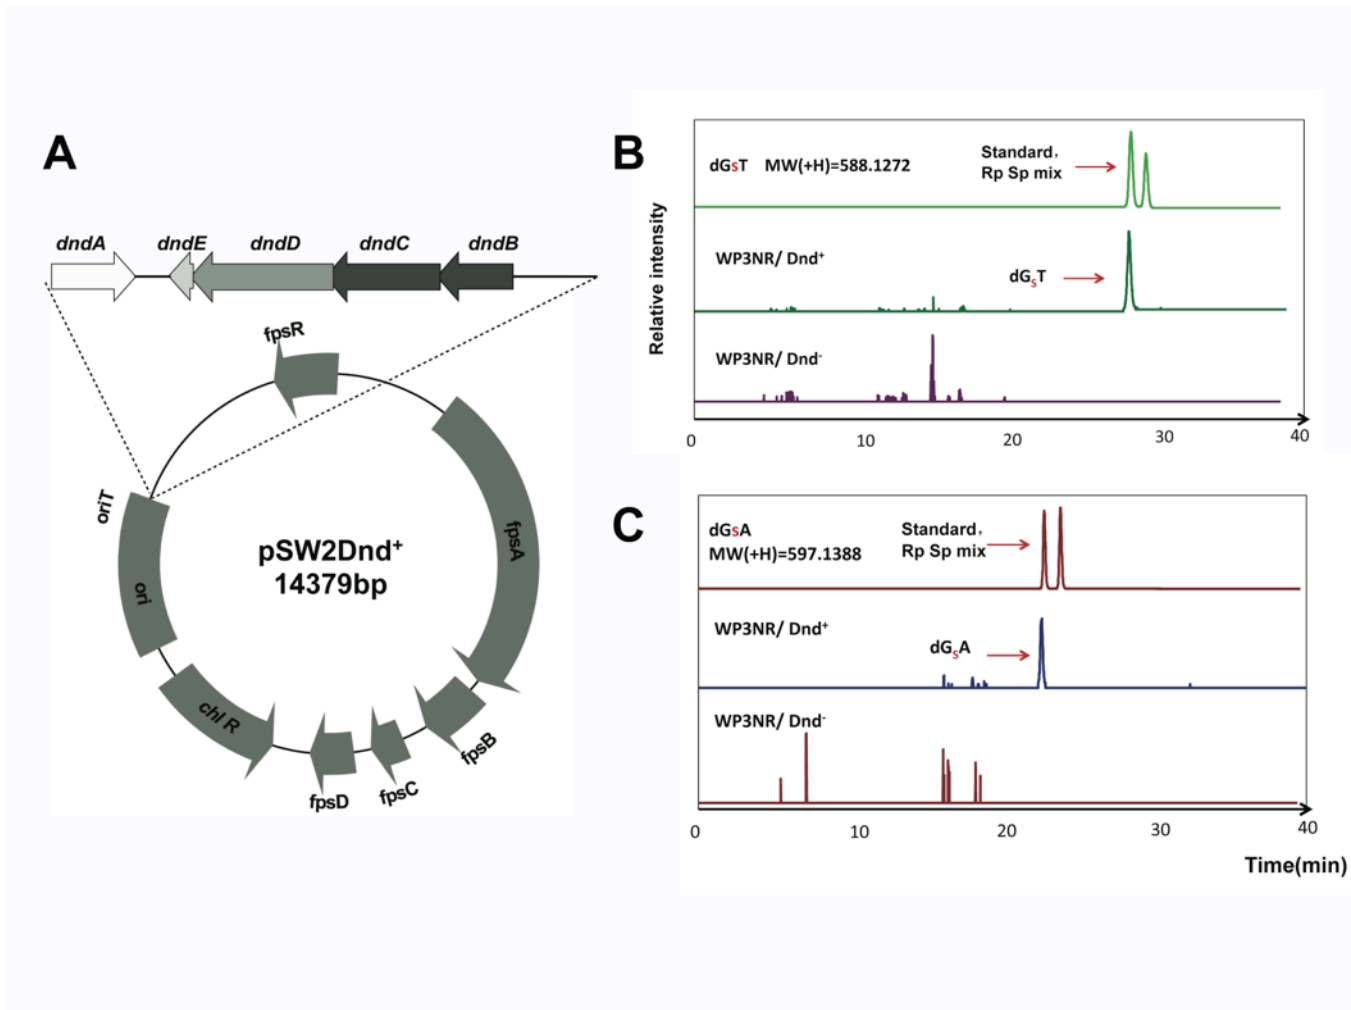

### Supplementary Fig. 5

Construction of a DNA PT modification mutant derived from *Shewanella piezotolerans* WP3. (A) Construction of a PT gene cluster clone plasmid functioning in *Shewanella piezotolerans* WP3 strains. *DndA* was cloned from plasmid pJTU3619 and *dndBCDE* genes were cloned from plasmid pJTU1238. (B, C) PT modification detection of WP3NR/ Dnd<sup>+</sup>. PT-linked dinucleotides were detected in the hydrolysate of WP3NR/ Dnd<sup>+</sup> genome DNA but not in the hydrolysate of WP3NR/Dnd<sup>-</sup> genome DNA.

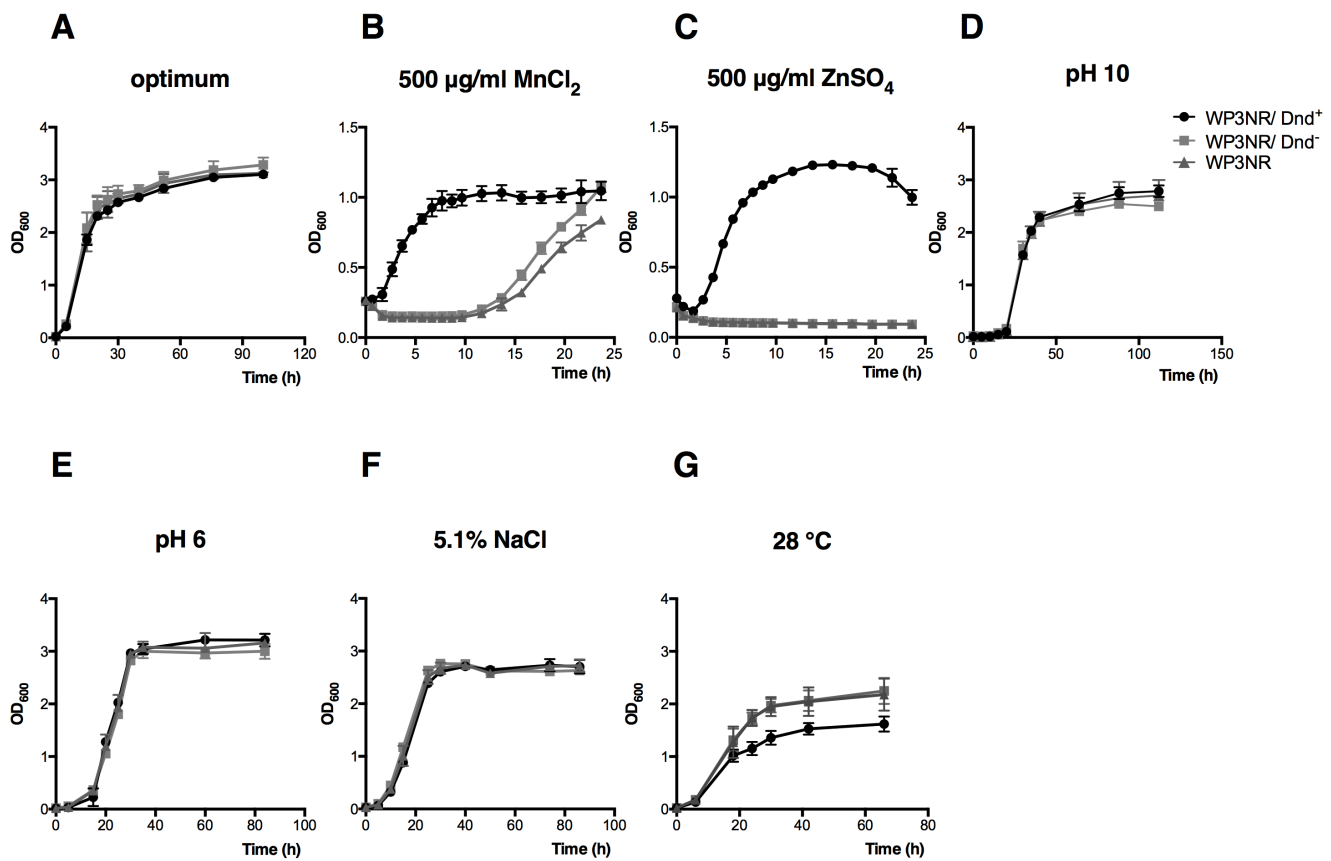

### Supplementary Fig. 6

Growth of *Shewanella piezotolerans* PT strains under multiple stresses. WP3NR/Dnd<sup>+</sup>, WP3NR/Dnd<sup>-</sup> and WP3NR were grown under high-temperature, high-salinity, MnCl<sub>2</sub>, ZnSO<sub>4</sub> and pH stress conditions, and the growth of the cells was monitored. The data shown represent the results of three independent experiments, and the error bars indicate the standard deviations.

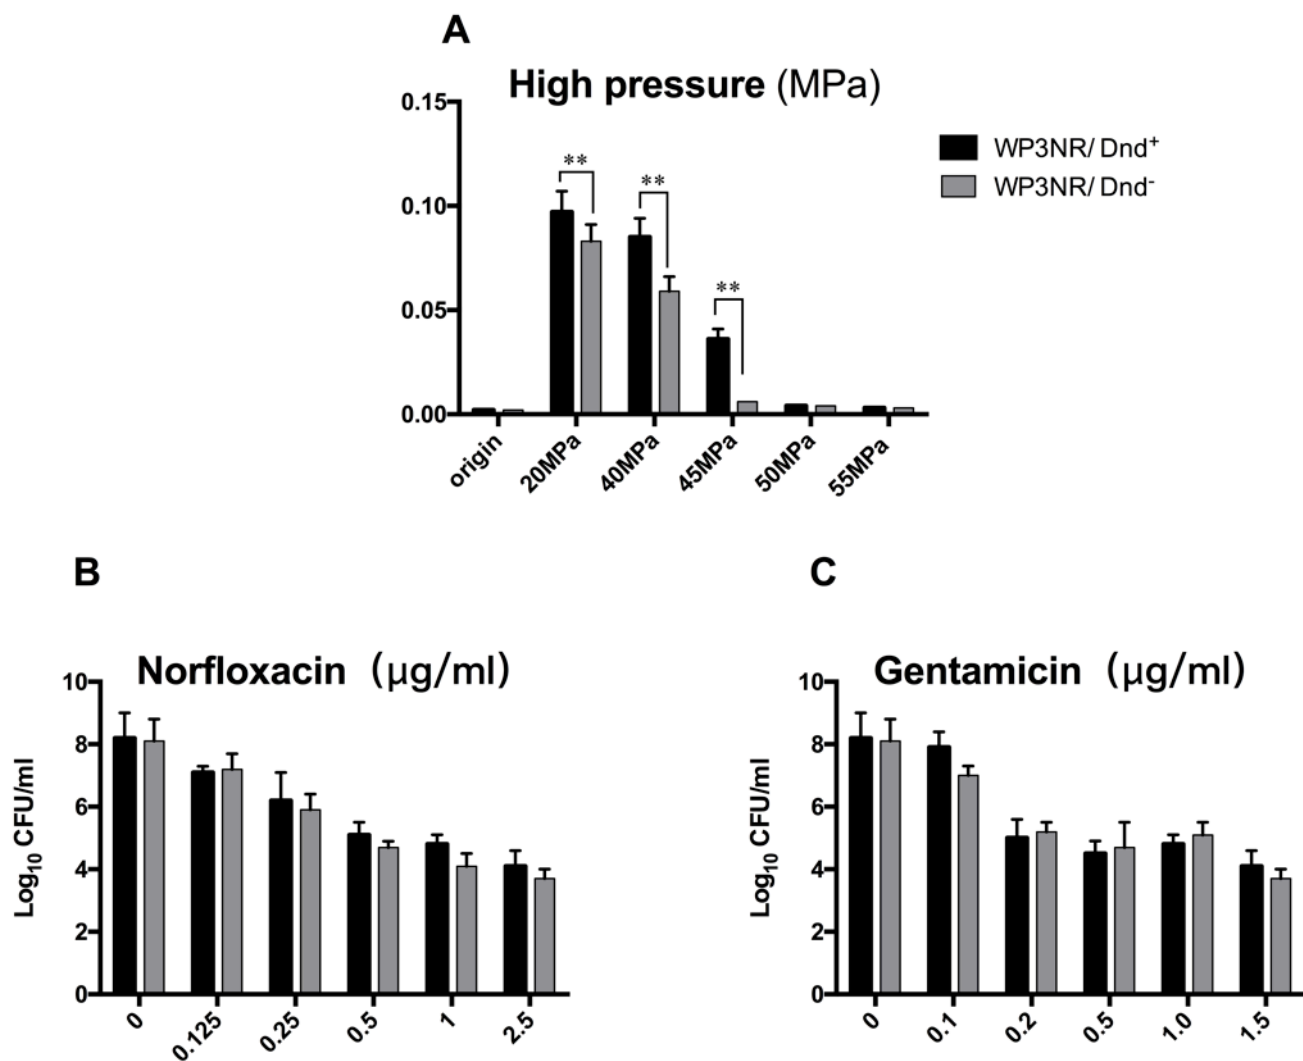

**Supplementary Fig. 7**

Maximum growth at high pressures and antibiotic killing efficacy of *Shewanella piezotolerans* PT strains. (A) WP3NR/Dnd<sup>+</sup> and WP3NR/Dnd<sup>-</sup> were grown for 60 hours, and the growth of the strains was assessed at OD<sub>600</sub>. (B-C) Colony count after different concentrations of antibiotic treatment. Ampicillin killing was not detected because WP3 has an ampicillin resistant gene. The data shown represent the results of three independent experiments, and the error bars indicate the standard deviations. The data were analyzed by Student's t test. \*\*, P < 0.01.



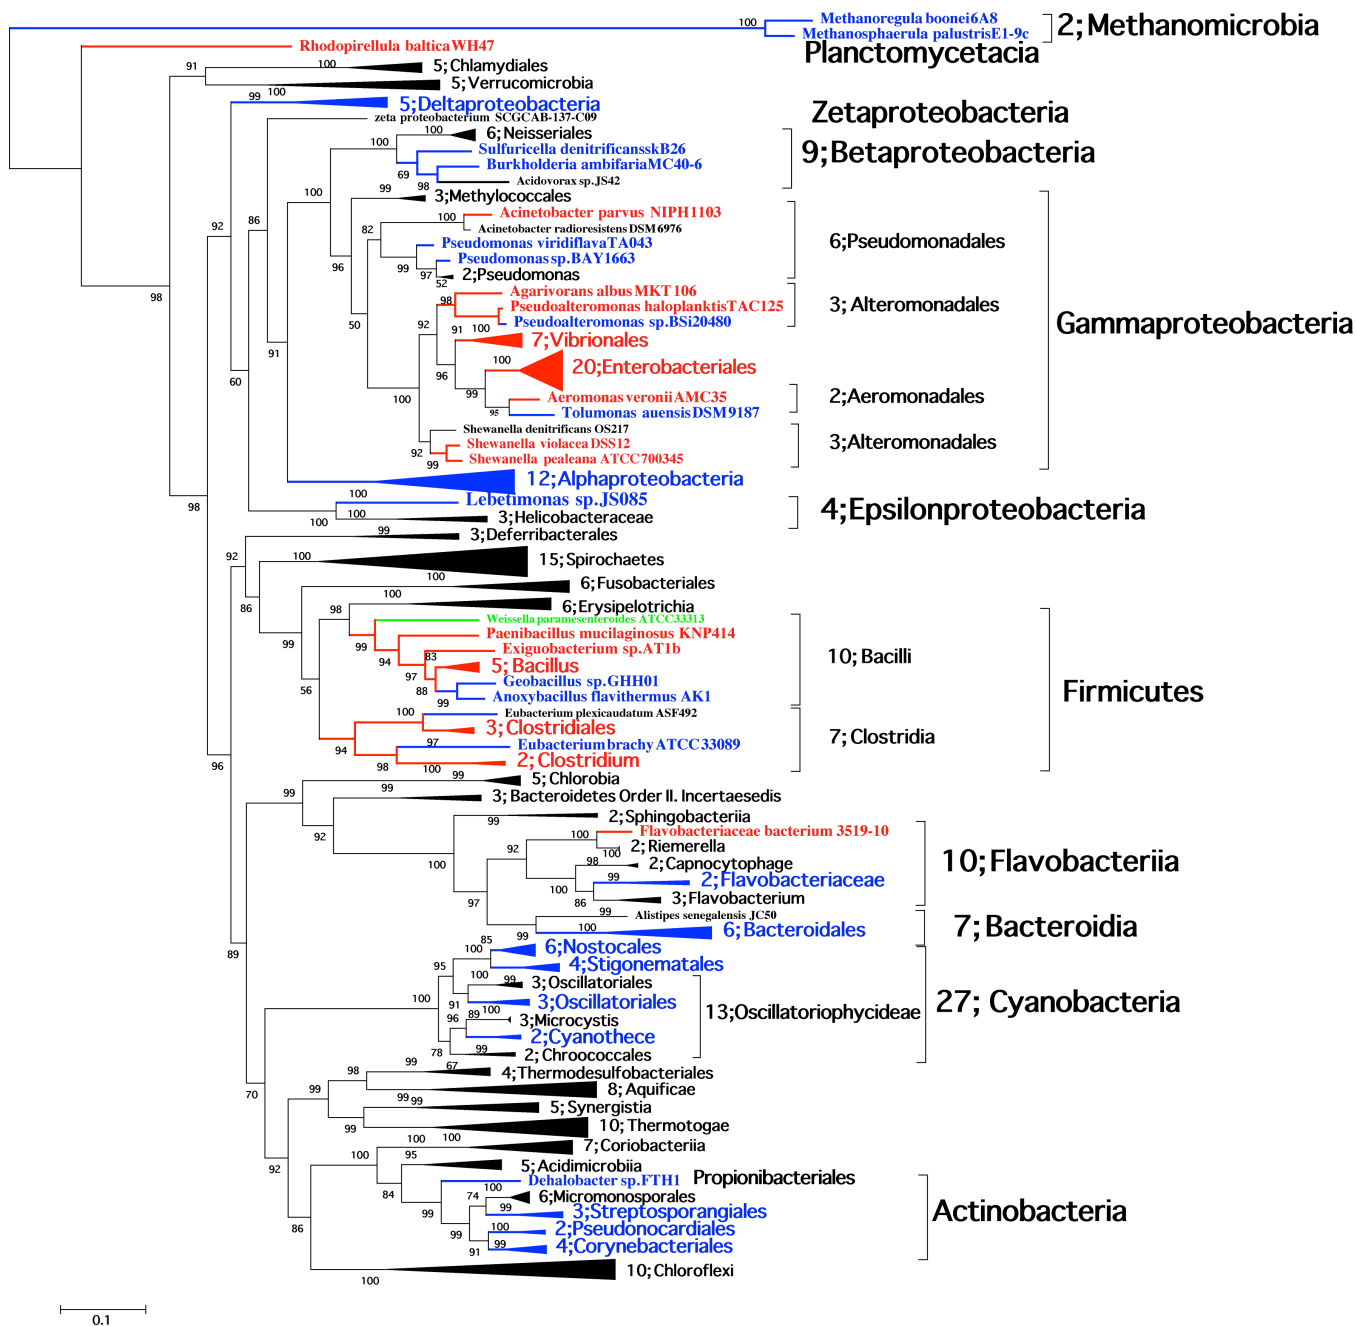

### Supplementary Fig. 8

Maximum likelihood-based phylogenetic tree of bacterial 16S rRNA gene sequences, with two Methanomicrobia as the outgroups. Bootstrap values are based on 1000 replicates, and percentages are shown at the nodes. The numbers of genomes in each collapsed clade are displayed before the clade name. Genomes containing both *dndCDE* and *dptFGH* clusters are colored in red, whereas genomes containing only the *dndCDE* cluster are highlighted in blue, and genomes containing only the *dptFGH* cluster are shown in green.

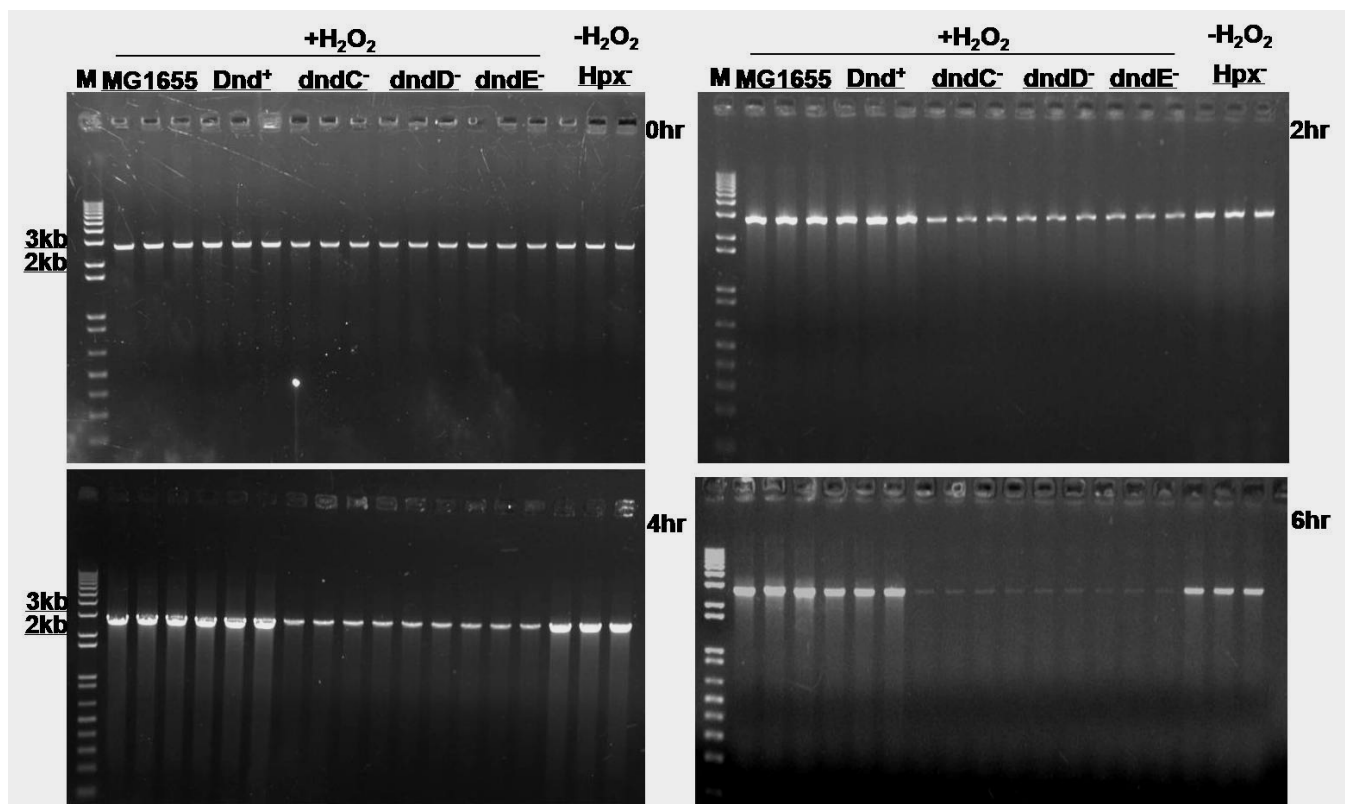

**Supplementary Fig. 9**  
Full-length gels of figure 3.

**Supplementary Table 1**Genes involved in antioxidation in the genome of *Shewanella piezotolerance* WP3

| <b>locus tag</b>     | <b>gene</b>         | <b>description</b>                                                      |
|----------------------|---------------------|-------------------------------------------------------------------------|
| swp_4429             | <i>katE</i>         | Catalase                                                                |
| swp_2307             | <i>soxR</i>         | SOD Transcriptional regulator                                           |
| swp_3819             | <i>sod</i> (nickel) | Nickel-containing superoxide dismutase                                  |
| swp_2754             | <i>sod</i> (iron)   | Superoxide dismutase, Fe                                                |
| swp_1821             | <i>ahp1</i>         | Alkyl hydroperoxide reductase/ Thiol specific antioxidant/ Mal allergen |
| swp_2738             | <i>ahp2</i>         | Alkyl hydroperoxide reductase/ Thiol specific antioxidant/ Mal allergen |
| swp_4205             | <i>ahp3</i>         | Alkyl hydroperoxide reductase/ Thiol specific antioxidant/ Mal allergen |
| swp_4326<br>swp_4327 | <i>ahp4</i>         | Alkyl hydroperoxide reductase/ Thiol specific antioxidant/ Mal allergen |
| swp_1272             | <i>gpx</i>          | Glutathione peroxidase                                                  |
| swp_4319             | <i>ohrR</i>         | transcriptional regulator, MarR family                                  |
| swp_4320             | <i>ohr</i>          | Redox protein, regulator of disulfide bond formation                    |
| swp_3799             | <i>oxyR</i>         | KatE,Ahp Transcriptional regulator                                      |
| swp_2088             |                     |                                                                         |
| swp_2866<br>swp_4142 | <i>ccp</i>          | Cytochrome-c peroxidase                                                 |
| swp_4608             |                     |                                                                         |
| swp_0167             | <i>dps</i>          | Ferritin and Dps                                                        |
| swp_0860             | <i>bcp</i>          | Bacterioferritin comigratory protein                                    |

**Supplementary Table 2**Presence of *dnd* and *dpt* gene clusters in publicly available procaryotic genomes in NCBI

| Species                                              | Presence of <i>dnd/dpt</i> gene clusters |
|------------------------------------------------------|------------------------------------------|
| <i>Acinetobacter baumannii</i> NIPH 146              | Both                                     |
| <i>Acinetobacter baumannii</i> RUH1486               | Both                                     |
| <i>Acinetobacter parvus</i> NIPH 1103                | Both                                     |
| <i>Acinetobacter</i> sp. YZS-X1-1                    | Both                                     |
| <i>Acinetobacter ursingii</i> DSM 16037 = CIP 107286 | Both                                     |
| <i>Aeromonas australiensis</i> CECT 8023             | Both                                     |
| <i>Aeromonas dhakensis</i> CIP 107500                | Both                                     |
| <i>Aeromonas hydrophila</i> 277                      | Both                                     |
| <i>Aeromonas jandaei</i> Riv2                        | Both                                     |
| <i>Aeromonas sobria</i> CECT 4245                    | Both                                     |
| <i>Aeromonas veronii</i> AMC35                       | Both                                     |
| <i>Aeromonas veronii</i> ARB3                        | Both                                     |
| <i>Agarivorans albus</i> MKT 106                     | Both                                     |
| <i>Alteromonas australica</i> H 17                   | Both                                     |
| <i>Bacillus aryabhatai</i> GZ03                      | Both                                     |
| <i>Bacillus cereus</i> BAG6X1-1                      | Both                                     |
| <i>Bacillus cereus</i> E33L                          | Both                                     |
| <i>Bacillus cereus</i> Rock1-3                       | Both                                     |
| <i>Bacillus cereus</i> VD169                         | Both                                     |
| <i>Bacillus firmus</i> DS1                           | Both                                     |
| <i>Bacillus isronensis</i> B3W22                     | Both                                     |
| <i>Bacillus</i> sp. EB01                             | Both                                     |
| <i>Bacillus</i> sp. J33                              | Both                                     |
| <i>Bacillus</i> sp. SA2-6                            | Both                                     |

|                                                                        |      |
|------------------------------------------------------------------------|------|
| <i>Bacillus</i> sp. SB49                                               | Both |
| <i>Bacillus thuringiensis</i> serovar <i>pondicheriensis</i> BGSC 4BA1 | Both |
| <i>Bermanella marisrubri</i> RED65                                     | Both |
| <i>Cedecea neteri</i> ND14a                                            | Both |
| <i>Citrobacter</i> sp. KTE30                                           | Both |
| <i>Clostridiales</i> bacterium oral taxon 876 str. F0540               | Both |
| <i>Clostridium bartlettii</i> CAG:1329                                 | Both |
| <i>Clostridium botulinum</i> 12LNR10-CD                                | Both |
| <i>Clostridium botulinum</i> 12LNRI-CD                                 | Both |
| <i>Clostridium botulinum</i> 29401-CD                                  | Both |
| <i>Clostridium botulinum</i> 43243-CD                                  | Both |
| <i>Clostridium botulinum</i> 48212-CD                                  | Both |
| <i>Clostridium botulinum</i> 50867-CD                                  | Both |
| <i>Clostridium botulinum</i> 55741-CD                                  | Both |
| <i>Clostridium botulinum</i> 58272-CD                                  | Both |
| <i>Clostridium botulinum</i> 58752-CD                                  | Both |
| <i>Clostridium botulinum</i> 69285-CD                                  | Both |
| <i>Clostridium botulinum</i> 71840-CD                                  | Both |
| <i>Clostridium botulinum</i> BKT015925                                 | Both |
| <i>Clostridium botulinum</i> BKT028387                                 | Both |
| <i>Clostridium botulinum</i> C/D str. BKT12695                         | Both |
| <i>Clostridium botulinum</i> C/D str. Sp77                             | Both |
| <i>Clostridium botulinum</i> E3 str. Alaska E43                        | Both |
| <i>Clostridium botulinum</i> NCTC 8266                                 | Both |
| <i>Clostridium botulinum</i> NCTC 8550                                 | Both |
| <i>Clostridium botulinum</i> V891                                      | Both |
| <i>Clostridium butyricum</i> DORA_1                                    | Both |
| <i>Clostridium ljungdahlii</i> DSM 13528                               | Both |

|                                                                                      |      |
|--------------------------------------------------------------------------------------|------|
| <i>Clostridium perfringens</i> NCTC 8239                                             | Both |
| <i>Clostridium</i> sp. CAG:127                                                       | Both |
| <i>Clostridium</i> sp. JC272                                                         | Both |
| <i>Cronobacter sakazakii</i> ES35                                                    | Both |
| <i>Desulfitobacterium metallireducens</i> DSM 15288                                  | Both |
| <i>Desulfovibrio desulfuricans</i> subsp. <i>aestuarii</i> DSM 17919<br>= ATCC 29578 | Both |
| <i>Dickeya solani</i> M005                                                           | Both |
| <i>Endozoicomonas numazuensis</i> DSM 25634                                          | Both |
| <i>Enterobacter aerogenes</i> GN02355                                                | Both |
| <i>Enterobacter aerogenes</i> UCI89                                                  | Both |
| <i>Enterobacter asburiae</i> C1                                                      | Both |
| <i>Enterobacter mori</i> LMG 25706                                                   | Both |
| <i>Enterobacter</i> sp. 638                                                          | Both |
| <i>Enterobacter</i> sp. Bisph1                                                       | Both |
| <i>Enterobacter</i> sp. GN02457                                                      | Both |
| <i>Enterobacter</i> sp. YD4                                                          | Both |
| <i>Enterobacteriaceae</i> bacterium LSJC7                                            | Both |
| <i>Enterovibrio calviensis</i> 1F-230                                                | Both |
| <i>Erwinia amylovora</i> 01SFR-BO                                                    | Both |
| <i>Erwinia amylovora</i> ACW56400                                                    | Both |
| <i>Erwinia amylovora</i> ATCC 49946                                                  | Both |
| <i>Erwinia amylovora</i> ATCC BAA-2158                                               | Both |
| <i>Erwinia amylovora</i> CFBP 1232                                                   | Both |
| <i>Erwinia amylovora</i> CFBP 2585                                                   | Both |
| <i>Erwinia amylovora</i> CFBP1430                                                    | Both |
| <i>Erwinia amylovora</i> Ea266                                                       | Both |
| <i>Erwinia amylovora</i> Ea356                                                       | Both |
| <i>Erwinia amylovora</i> LA635                                                       | Both |

|                                        |      |
|----------------------------------------|------|
| <i>Erwinia amylovora</i> LA636         | Both |
| <i>Erwinia amylovora</i> LA637         | Both |
| <i>Erwinia amylovora</i> NBRC 12687    | Both |
| <i>Erwinia amylovora</i> UPN527        | Both |
| <i>Escherichia coli</i> 1.2264         | Both |
| <i>Escherichia coli</i> 10.0821        | Both |
| <i>Escherichia coli</i> 113290         | Both |
| <i>Escherichia coli</i> 1-250-04_S1_C1 | Both |
| <i>Escherichia coli</i> 1-250-04_S1_C2 | Both |
| <i>Escherichia coli</i> 1-250-04_S1_C3 | Both |
| <i>Escherichia coli</i> 1365           | Both |
| <i>Escherichia coli</i> 2-052-05_S3_C1 | Both |
| <i>Escherichia coli</i> 2-052-05_S3_C2 | Both |
| <i>Escherichia coli</i> 2-052-05_S3_C3 | Both |
| <i>Escherichia coli</i> 2-156-04_S3_C2 | Both |
| <i>Escherichia coli</i> 2-222-05_S4_C2 | Both |
| <i>Escherichia coli</i> 2-222-05_S4_C3 | Both |
| <i>Escherichia coli</i> 2-474-04_S1_C2 | Both |
| <i>Escherichia coli</i> 2-474-04_S4_C1 | Both |
| <i>Escherichia coli</i> 2-474-04_S4_C2 | Both |
| <i>Escherichia coli</i> 2-474-04_S4_C3 | Both |
| <i>Escherichia coli</i> 3-475-03_S1_C1 | Both |
| <i>Escherichia coli</i> 38.34          | Both |
| <i>Escherichia coli</i> 5-366-08_S3_C1 | Both |
| <i>Escherichia coli</i> 5-366-08_S3_C3 | Both |
| <i>Escherichia coli</i> 53C            | Both |
| <i>Escherichia coli</i> 55989          | Both |
| <i>Escherichia coli</i> 688_ECOL       | Both |
| <i>Escherichia coli</i> 689_ECOL       | Both |

|                                           |      |
|-------------------------------------------|------|
| <i>Escherichia coli</i> 85B               | Both |
| <i>Escherichia coli</i> 8624              | Both |
| <i>Escherichia coli</i> 95.1288           | Both |
| <i>Escherichia coli</i> AI27              | Both |
| <i>Escherichia coli</i> B144-c1           | Both |
| <i>Escherichia coli</i> B7A               | Both |
| <i>Escherichia coli</i> BIDMC 71          | Both |
| <i>Escherichia coli</i> BIDMC 77          | Both |
| <i>Escherichia coli</i> blood-08-1415     | Both |
| <i>Escherichia coli</i> blood-08-1487     | Both |
| <i>Escherichia coli</i> blood-08-1493     | Both |
| <i>Escherichia coli</i> blood-08-1562     | Both |
| <i>Escherichia coli</i> blood-08-1563rep1 | Both |
| <i>Escherichia coli</i> blood-08-1563rep2 | Both |
| <i>Escherichia coli</i> blood-08-1636     | Both |
| <i>Escherichia coli</i> blood-09-1229     | Both |
| <i>Escherichia coli</i> blood-09-1342     | Both |
| <i>Escherichia coli</i> blood-2011-0141   | Both |
| <i>Escherichia coli</i> C496_10           | Both |
| <i>Escherichia coli</i> CFSAN026775       | Both |
| <i>Escherichia coli</i> CFSAN026796       | Both |
| <i>Escherichia coli</i> CFSAN026809       | Both |
| <i>Escherichia coli</i> CFSAN026810       | Both |
| <i>Escherichia coli</i> CVM N33601PS      | Both |
| <i>Escherichia coli</i> CVM N33624PS      | Both |
| <i>Escherichia coli</i> CVM N33720PS      | Both |
| <i>Escherichia coli</i> CVM N34077PS      | Both |
| <i>Escherichia coli</i> CVM N34557PS      | Both |
| <i>Escherichia coli</i> CVM N36093PS      | Both |



|                                             |      |
|---------------------------------------------|------|
| <i>Escherichia coli</i> CVM N36158PS        | Both |
| <i>Escherichia coli</i> CVM N38733PS        | Both |
| <i>Escherichia coli</i> CVM N41498PS        | Both |
| <i>Escherichia coli</i> DEC9A               | Both |
| <i>Escherichia coli</i> E. coli             | Both |
| <i>Escherichia coli</i> E482                | Both |
| <i>Escherichia coli</i> F6700               | Both |
| <i>Escherichia coli</i> FDA506              | Both |
| <i>Escherichia coli</i> H299                | Both |
| <i>Escherichia coli</i> HVH 108 (4-6924867) | Both |
| <i>Escherichia coli</i> HVH 136 (4-5970458) | Both |
| <i>Escherichia coli</i> HVH 182 (4-0985554) | Both |
| <i>Escherichia coli</i> HVH 43 (4-2173468)  | Both |
| <i>Escherichia coli</i> HVH 44 (4-2298570)  | Both |
| <i>Escherichia coli</i> INSLA289            | Both |
| <i>Escherichia coli</i> IS1                 | Both |
| <i>Escherichia coli</i> KOEGE 118 (317a)    | Both |
| <i>Escherichia coli</i> KOEGE 7 (16a)       | Both |
| <i>Escherichia coli</i> KTE125              | Both |
| <i>Escherichia coli</i> KTE144              | Both |
| <i>Escherichia coli</i> KTE19               | Both |
| <i>Escherichia coli</i> KTE202              | Both |
| <i>Escherichia coli</i> KTE50               | Both |
| <i>Escherichia coli</i> KTE9                | Both |
| <i>Escherichia coli</i> MGH 57              | Both |
| <i>Escherichia coli</i> MP020940.1          | Both |
| <i>Escherichia coli</i> MS 117-3            | Both |
| <i>Escherichia coli</i> MS 45-1             | Both |
| <i>Escherichia coli</i> O08                 | Both |

|                                            |      |
|--------------------------------------------|------|
| <i>Escherichia coli</i> O15:H18 str. K1516 | Both |
| <i>Escherichia coli</i> O174:H21           | Both |
| <i>Escherichia coli</i> OLC-733            | Both |
| <i>Escherichia coli</i> P0304816.1         | Both |
| <i>Escherichia coli</i> P0304816.10        | Both |
| <i>Escherichia coli</i> P0304816.11        | Both |
| <i>Escherichia coli</i> P0304816.12        | Both |
| <i>Escherichia coli</i> P0304816.13        | Both |
| <i>Escherichia coli</i> P0304816.14        | Both |
| <i>Escherichia coli</i> P0304816.15        | Both |
| <i>Escherichia coli</i> P0304816.2         | Both |
| <i>Escherichia coli</i> P0304816.3         | Both |
| <i>Escherichia coli</i> P0304816.4         | Both |
| <i>Escherichia coli</i> P0304816.5         | Both |
| <i>Escherichia coli</i> P0304816.6         | Both |
| <i>Escherichia coli</i> P0304816.7         | Both |
| <i>Escherichia coli</i> P0304816.8         | Both |
| <i>Escherichia coli</i> P0304816.9         | Both |
| <i>Escherichia coli</i> S.93               | Both |
| <i>Escherichia coli</i> SE11               | Both |
| <i>Escherichia coli</i> ST2747             | Both |
| <i>Escherichia coli</i> UMEA 3053-1        | Both |
| <i>Escherichia coli</i> UMEA 3144-1        | Both |
| <i>Escherichia coli</i> UMEA 3176-1        | Both |
| <i>Escherichia coli</i> UMEA 3200-1        | Both |
| <i>Escherichia coli</i> upec-132           | Both |
| <i>Escherichia coli</i> upec-137           | Both |
| <i>Escherichia coli</i> upec-66            | Both |
| <i>Escherichia fergusonii</i> ECD227       | Both |

|                                                    |      |
|----------------------------------------------------|------|
| <i>Exiguobacterium</i> sp. AB2                     | Both |
| <i>Exiguobacterium</i> sp. AT1b                    | Both |
| <i>Exiguobacterium</i> sp. S17                     | Both |
| <i>Ferrimonas kyonanensis</i> DSM 18153            | Both |
| <i>Flavobacteriaceae bacterium</i> 3519-10         | Both |
| <i>Franconibacter pulveris</i> LMG 24059           | Both |
| <i>Gilliamella apicola</i> SCGC AB-598-B02         | Both |
| <i>Grimontia hollisae</i> CIP 101886               | Both |
| <i>Hahella chejuensis</i> KCTC 2396                | Both |
| <i>Halomonas</i> sp. BC04                          | Both |
| <i>Halomonas</i> sp. TD01                          | Both |
| <i>Halomonas</i> sp. TG39a                         | Both |
| <i>Idiomarina</i> sp. A28L                         | Both |
| <i>Klebsiella oxytoca</i> CH2                      | Both |
| <i>Klebsiella oxytoca</i> CH5                      | Both |
| <i>Klebsiella pneumoniae</i> CICC10011             | Both |
| <i>Lachnospiraceae bacterium</i> 2_1_58FAA         | Both |
| <i>Lachnospiraceae bacterium</i> 6_1_37FAA         | Both |
| <i>Leminorella grimontii</i> ATCC 33999 = DSM 5078 | Both |
| <i>Maribacter forsetii</i> DSM 18668               | Both |
| <i>Marinobacter</i> sp. AK21                       | Both |
| <i>Marinobacter</i> sp. C1S70                      | Both |
| <i>Marinospirillum insulare</i> DSM 21763          | Both |
| <i>Microscilla marina</i> ATCC 23134               | Both |
| <i>Olleya</i> sp. VCSM12                           | Both |
| <i>Paenibacillus dauci</i> H9                      | Both |
| <i>Paenibacillus mucilaginosus</i> KNP414          | Both |
| <i>Pantoea ananatis</i> GB1                        | Both |
| <i>Paraglaciecola psychrophila</i> 170             | Both |

|                                                                                            |      |
|--------------------------------------------------------------------------------------------|------|
| <i>Peptoclostridium difficile</i> 70-100-2010                                              | Both |
| <i>Peptoclostridium difficile</i> CD104                                                    | Both |
| <i>Peptoclostridium difficile</i> CD201                                                    | Both |
| <i>Peptoclostridium difficile</i> CD206                                                    | Both |
| <i>Peptoclostridium difficile</i> CD212                                                    | Both |
| <i>Peptoclostridium difficile</i> CD41                                                     | Both |
| <i>Peptoclostridium difficile</i> E12                                                      | Both |
| <i>Photobacterium angustum</i> ATCC 25915                                                  | Both |
| <i>Photobacterium gaetbulicola</i> Gung47                                                  | Both |
| <i>Photorhabdus luminescens</i> LN2                                                        | Both |
| <i>Photorhabdus temperata</i> subsp. <i>khanii</i> NC19                                    | Both |
| <i>Pseudoalteromonas haloplanktis</i> TAC125                                               | Both |
| <i>Pseudoalteromonas luteoviolacea</i> HI1                                                 | Both |
| <i>Pseudoalteromonas piscicida</i> ATCC 15057                                              | Both |
| <i>Pseudoalteromonas piscicida</i> JCM 20779                                               | Both |
| <i>Pseudoalteromonas rubra</i> DSM 6842                                                    | Both |
| <i>Pseudoalteromonas ruthenica</i> S3137                                                   | Both |
| <i>Pseudoalteromonas ruthenica</i> S3258                                                   | Both |
| <i>Pseudoalteromonas</i> sp. PAMC 22718                                                    | Both |
| <i>Rheinheimera baltica</i> DSM 14885                                                      | Both |
| <i>Rheinheimera</i> sp. IITR-13                                                            | Both |
| <i>Rhodopirellula baltica</i> WH47                                                         | Both |
| <i>Rouxiella chamberiensis</i> 130333                                                      | Both |
| <i>Ruminococcus gnavus</i> CC55_001C                                                       | Both |
| <i>Salmonella enterica</i> subsp. <i>enterica</i> serovar <i>Bareilly</i> str. CFSAN000183 | Both |
| <i>Salmonella enterica</i> subsp. <i>enterica</i> serovar <i>Bareilly</i> str. CFSAN000184 | Both |
| <i>Salmonella enterica</i> subsp. <i>enterica</i> serovar <i>Bareilly</i> str. CFSAN000187 | Both |

|                                                                                               |      |
|-----------------------------------------------------------------------------------------------|------|
| <i>Salmonella enterica</i> subsp. <i>enterica</i> serovar <i>Bareilly</i> str.<br>CFSAN000192 | Both |
| <i>Salmonella enterica</i> subsp. <i>enterica</i> serovar <i>Bareilly</i> str.<br>CFSAN000194 | Both |
| <i>Salmonella enterica</i> subsp. <i>enterica</i> serovar <i>Bareilly</i> str.<br>CFSAN000195 | Both |
| <i>Salmonella enterica</i> subsp. <i>enterica</i> serovar <i>Bareilly</i> str.<br>CFSAN000196 | Both |
| <i>Salmonella enterica</i> subsp. <i>enterica</i> serovar <i>Bareilly</i> str.<br>CFSAN000198 | Both |
| <i>Salmonella enterica</i> subsp. <i>enterica</i> serovar <i>Bareilly</i> str.<br>CFSAN000199 | Both |
| <i>Salmonella enterica</i> subsp. <i>enterica</i> serovar <i>Bareilly</i> str.<br>CFSAN000201 | Both |
| <i>Salmonella enterica</i> subsp. <i>enterica</i> serovar <i>Bareilly</i> str.<br>CFSAN000202 | Both |
| <i>Salmonella enterica</i> subsp. <i>enterica</i> serovar <i>Bareilly</i> str.<br>CFSAN000203 | Both |
| <i>Salmonella enterica</i> subsp. <i>enterica</i> serovar <i>Bareilly</i> str.<br>CFSAN000204 | Both |
| <i>Salmonella enterica</i> subsp. <i>enterica</i> serovar <i>Bareilly</i> str.<br>CFSAN000206 | Both |
| <i>Salmonella enterica</i> subsp. <i>enterica</i> serovar <i>Bareilly</i> str.<br>CFSAN000208 | Both |
| <i>Salmonella enterica</i> subsp. <i>enterica</i> serovar <i>Bareilly</i> str.<br>CFSAN000209 | Both |
| <i>Salmonella enterica</i> subsp. <i>enterica</i> serovar <i>Bareilly</i> str.<br>CFSAN000210 | Both |
| <i>Salmonella enterica</i> subsp. <i>enterica</i> serovar <i>Bareilly</i> str.<br>CFSAN000214 | Both |
| <i>Salmonella enterica</i> subsp. <i>enterica</i> serovar <i>Bareilly</i> str.<br>CFSAN000216 | Both |
| <i>Salmonella enterica</i> subsp. <i>enterica</i> serovar <i>Bareilly</i> str.<br>CFSAN000218 | Both |

|                                                                                               |      |
|-----------------------------------------------------------------------------------------------|------|
| <i>Salmonella enterica</i> subsp. <i>enterica</i> serovar <i>Bareilly</i> str.<br>CFSAN000219 | Both |
| <i>Salmonella enterica</i> subsp. <i>enterica</i> serovar <i>Bareilly</i> str.<br>CFSAN000220 | Both |
| <i>Salmonella enterica</i> subsp. <i>enterica</i> serovar <i>Bareilly</i> str.<br>CFSAN000222 | Both |
| <i>Salmonella enterica</i> subsp. <i>enterica</i> serovar <i>Bareilly</i> str.<br>CFSAN000223 | Both |
| <i>Salmonella enterica</i> subsp. <i>enterica</i> serovar <i>Bareilly</i> str.<br>CFSAN000224 | Both |
| <i>Salmonella enterica</i> subsp. <i>enterica</i> serovar <i>Bareilly</i> str.<br>CFSAN000225 | Both |
| <i>Salmonella enterica</i> subsp. <i>enterica</i> serovar <i>Bareilly</i> str.<br>CFSAN000227 | Both |
| <i>Salmonella enterica</i> subsp. <i>enterica</i> serovar <i>Bareilly</i> str.<br>CFSAN000233 | Both |
| <i>Salmonella enterica</i> subsp. <i>enterica</i> serovar <i>Cerro</i> FSL<br>R8-0235         | Both |
| <i>Salmonella enterica</i> subsp. <i>enterica</i> serovar <i>Cerro</i> str.<br>5569           | Both |
| <i>Salmonella enterica</i> subsp. <i>enterica</i> serovar <i>Cerro</i> str.<br>818            | Both |
| <i>Salmonella enterica</i> subsp. <i>enterica</i> serovar <i>Cerro</i> str.<br>87             | Both |
| <i>Salmonella enterica</i> subsp. <i>enterica</i> serovar <i>Cerro</i> str.<br>CFSAN001587    | Both |
| <i>Salmonella enterica</i> subsp. <i>enterica</i> serovar <i>Cerro</i> str.<br>CFSAN001588    | Both |
| <i>Salmonella enterica</i> subsp. <i>enterica</i> serovar <i>Cerro</i> str.<br>CFSAN001589    | Both |
| <i>Salmonella enterica</i> subsp. <i>enterica</i> serovar <i>Cerro</i> str.<br>CFSAN001590    | Both |
| <i>Salmonella enterica</i> subsp. <i>enterica</i> serovar <i>Cerro</i> str.<br>CFSAN001669    | Both |
| <i>Salmonella enterica</i> subsp. <i>enterica</i> serovar <i>Cerro</i> str.<br>CFSAN001670    | Both |

|                                                                                               |      |
|-----------------------------------------------------------------------------------------------|------|
| <i>Salmonella enterica</i> subsp. <i>enterica</i> serovar <i>Cerro</i> str.<br>CFSAN001671    | Both |
| <i>Salmonella enterica</i> subsp. <i>enterica</i> serovar <i>Cerro</i> str.<br>CFSAN001673    | Both |
| <i>Salmonella enterica</i> subsp. <i>enterica</i> serovar <i>Cerro</i> str.<br>CFSAN001674    | Both |
| <i>Salmonella enterica</i> subsp. <i>enterica</i> serovar <i>Cerro</i> str.<br>CFSAN001679    | Both |
| <i>Salmonella enterica</i> subsp. <i>enterica</i> serovar <i>Cerro</i> str.<br>CFSAN001680    | Both |
| <i>Salmonella enterica</i> subsp. <i>enterica</i> serovar <i>Cerro</i> str.<br>CFSAN001681    | Both |
| <i>Salmonella enterica</i> subsp. <i>enterica</i> serovar <i>Cerro</i> str.<br>CFSAN001690    | Both |
| <i>Salmonella enterica</i> subsp. <i>enterica</i> serovar <i>Cerro</i> str.<br>CFSAN001691    | Both |
| <i>Salmonella enterica</i> subsp. <i>enterica</i> serovar <i>Cerro</i> str.<br>CFSAN001692    | Both |
| <i>Salmonella enterica</i> subsp. <i>enterica</i> serovar <i>Cerro</i> str.<br>CFSAN001697    | Both |
| <i>Salmonella enterica</i> subsp. <i>enterica</i> serovar <i>Mbandaka</i><br>str. 2012K-0273  | Both |
| <i>Salmonella enterica</i> subsp. <i>enterica</i> serovar <i>Mbandaka</i><br>str. CVM N45957  | Both |
| <i>Salmonella enterica</i> subsp. <i>enterica</i> serovar <i>Mbandaka</i><br>str. CVM N51315  | Both |
| <i>Salmonella enterica</i> subsp. <i>enterica</i> serovar <i>Namur</i> str.<br>05-2929        | Both |
| <i>Salmonella enterica</i> subsp. <i>enterica</i> serovar <i>Panama</i> str.<br>ATCC 7378     | Both |
| <i>Salmonella enterica</i> subsp. <i>enterica</i> serovar <i>Saintpaul</i><br>str. 9712       | Both |
| <i>Salmonella enterica</i> subsp. <i>enterica</i> serovar <i>Saintpaul</i><br>str. CVM N43456 | Both |

|                                                                                               |      |
|-----------------------------------------------------------------------------------------------|------|
| <i>Salmonella enterica</i> subsp. <i>enterica</i> serovar <i>Saintpaul</i><br>str. CVM N43461 | Both |
| <i>Salmonella enterica</i> subsp. <i>enterica</i> serovar <i>Saintpaul</i><br>str. CVM N45394 | Both |
| <i>Salmonella enterica</i> subsp. <i>enterica</i> serovar <i>Saintpaul</i><br>str. CVM N45926 | Both |
| <i>Salmonella enterica</i> subsp. <i>enterica</i> serovar <i>Saintpaul</i><br>str. CVM N45953 | Both |
| <i>Salmonella enterica</i> subsp. <i>enterica</i> serovar <i>Saintpaul</i><br>str. CVM N46823 | Both |
| <i>Salmonella enterica</i> subsp. <i>enterica</i> serovar <i>Saintpaul</i><br>str. CVM N46830 | Both |
| <i>Salmonella enterica</i> subsp. <i>enterica</i> serovar <i>Saintpaul</i><br>str. CVM N46832 | Both |
| <i>Salmonella enterica</i> subsp. <i>enterica</i> serovar <i>Saintpaul</i><br>str. CVM N46846 | Both |
| <i>Salmonella enterica</i> subsp. <i>enterica</i> serovar <i>Saintpaul</i><br>str. CVM N46847 | Both |
| <i>Salmonella enterica</i> subsp. <i>enterica</i> serovar <i>Saintpaul</i><br>str. CVM N47713 | Both |
| <i>Salmonella enterica</i> subsp. <i>enterica</i> serovar <i>Saintpaul</i><br>str. CVM N47719 | Both |
| <i>Salmonella enterica</i> subsp. <i>enterica</i> serovar <i>Saintpaul</i><br>str. CVM N47724 | Both |
| <i>Salmonella enterica</i> subsp. <i>enterica</i> serovar <i>Saintpaul</i><br>str. CVM N47725 | Both |
| <i>Salmonella enterica</i> subsp. <i>enterica</i> serovar <i>Saintpaul</i><br>str. CVM N48678 | Both |
| <i>Salmonella enterica</i> subsp. <i>enterica</i> serovar <i>Saintpaul</i><br>str. CVM N48697 | Both |
| <i>Salmonella enterica</i> subsp. <i>enterica</i> serovar <i>Saintpaul</i><br>str. CVM N48698 | Both |
| <i>Salmonella enterica</i> subsp. <i>enterica</i> serovar <i>Saintpaul</i><br>str. CVM N50422 | Both |



|                                                                                               |      |
|-----------------------------------------------------------------------------------------------|------|
| <i>Salmonella enterica</i> subsp. <i>enterica</i> serovar <i>Saintpaul</i><br>str. CVM N50423 | Both |
| <i>Salmonella enterica</i> subsp. <i>enterica</i> serovar <i>Saintpaul</i><br>str. CVM N51245 | Both |
| <i>Salmonella enterica</i> subsp. <i>enterica</i> serovar <i>Saintpaul</i><br>str. CVM N51291 | Both |
| <i>Salmonella enterica</i> subsp. <i>enterica</i> serovar <i>Saintpaul</i><br>str. JO2008     | Both |
| <i>Salmonella enterica</i> subsp. <i>enterica</i> serovar <i>Saintpaul</i><br>str. SARA23     | Both |
| <i>Salmonella enterica</i> subsp. <i>enterica</i> serovar <i>Saintpaul</i><br>str. SARA26     | Both |
| <i>Serratia marcescens</i> FGI94                                                              | Both |
| <i>Serratia plymuthica</i> 4Rx13                                                              | Both |
| <i>Shewanella pealeana</i> ATCC 700345                                                        | Both |
| <i>Shewanella violacea</i> DSS12                                                              | Both |
| <i>Siccibacter turicensis</i> z3032                                                           | Both |
| <i>Sporosarcina ureae</i> DSM 2281                                                            | Both |
| <i>Terrisporobacter glycolicus</i> ATCC 14880 = DSM 1288                                      | Both |
| <i>Vibrio albensis</i> ATCC 14547                                                             | Both |
| <i>Vibrio albensis</i> VL426                                                                  | Both |
| <i>Vibrio campbellii</i> 051011F                                                              | Both |
| <i>Vibrio campbellii</i> CCS02                                                                | Both |
| <i>Vibrio cholerae</i> 133-73                                                                 | Both |
| <i>Vibrio cholerae</i> 1587                                                                   | Both |
| <i>Vibrio cholerae</i> 2012Env-9                                                              | Both |
| <i>Vibrio cholerae</i> BJG-01                                                                 | Both |
| <i>Vibrio cholerae</i> CP1037(10)                                                             | Both |
| <i>Vibrio cholerae</i> MZO-2                                                                  | Both |
| <i>Vibrio cholerae</i> MZO-3                                                                  | Both |
| <i>Vibrio cholerae</i> ZWU0020                                                                | Both |

|                                          |      |
|------------------------------------------|------|
| <i>Vibrio crassostreae</i> 9ZC77         | Both |
| <i>Vibrio crassostreae</i> J5-15         | Both |
| <i>Vibrio crassostreae</i> J5-4          | Both |
| <i>Vibrio crassostreae</i> J5-5          | Both |
| <i>Vibrio crassostreae</i> LGP7          | Both |
| <i>Vibrio cyclitrophicus</i> ZF65        | Both |
| <i>Vibrio ezurae</i> NBRC 102218         | Both |
| <i>Vibrio fischeri</i> MJ11              | Both |
| <i>Vibrio genomosp. F10 str.</i> 9ZC157  | Both |
| <i>Vibrio harveyi</i> 823TEZ1            | Both |
| <i>Vibrio harveyi</i> CAIM 1792          | Both |
| <i>Vibrio nigripulchritudo</i> MADA3020  | Both |
| <i>Vibrio nigripulchritudo</i> MADA3021  | Both |
| <i>Vibrio nigripulchritudo</i> MADA3029  | Both |
| <i>Vibrio nigripulchritudo</i> SFn118    | Both |
| <i>Vibrio parahaemolyticus</i> 3259      | Both |
| <i>Vibrio parahaemolyticus</i> B-265     | Both |
| <i>Vibrio parahaemolyticus</i> EKP-008   | Both |
| <i>Vibrio parahaemolyticus</i> K5030     | Both |
| <i>Vibrio parahaemolyticus</i> NIHCB0603 | Both |
| <i>Vibrio parahaemolyticus</i> S001      | Both |
| <i>Vibrio parahaemolyticus</i> S148      | Both |
| <i>Vibrio parahaemolyticus</i> S152      | Both |
| <i>Vibrio parahaemolyticus</i> S160      | Both |
| <i>Vibrio parahaemolyticus</i> S164      | Both |
| <i>Vibrio parahaemolyticus</i> S166      | Both |
| <i>Vibrio Parahaemolyticus</i> VIP4-0439 | Both |
| <i>Vibrio parahaemolyticus</i> VIP4-0445 | Both |
| <i>Vibrio</i> sp. JCM 18905              | Both |

|                                                  |      |
|--------------------------------------------------|------|
| <i>Vibrio</i> sp. JCM 19232                      | Both |
| <i>Vibrio splendidus</i> ZS-139                  | Both |
| <i>Vibrio tasmaniensis</i> 1F-267                | Both |
| <i>Vibrio vulnificus</i> 491771                  | Both |
| <i>Vibrio vulnificus</i> ATCC 33147              | Both |
| <i>Vibrio vulnificus</i> B2                      | Both |
| <i>Vibrio vulnificus</i> BAA87                   | Both |
| <i>Vibrio vulnificus</i> NBRC 15645 = ATCC 27562 | Both |
| <i>Vibrio vulnificus</i> NV22                    | Both |
| <i>Vibrio vulnificus</i> VV4-03                  | Both |
| <i>Vibrio vulnificus</i> VV9-09                  | Both |
| <i>Yersinia enterocolitica</i> FE80217           | Both |
| <i>Yersinia intermedia</i> FCF130                | Both |
| <i>Yersinia intermedia</i> FCF84                 | Both |
| <i>Yersinia ruckeri</i> YRB                      | Both |
| <i>Clostridium asparagiforme</i> DSM 15981       | dnd  |
| <i>Clostridium clostridioforme</i> CM201         | dnd  |
| <i>Clostridium papyrosolvens</i> DSM 2782        | dnd  |
| <i>Oscillatoria</i> sp. PCC 6506                 | dnd  |
| <i>Scytonema hofmanni</i> UTEX 2349              | dnd  |
| <i>Acaryochloris</i> sp. CCMEE 5410              | dnd  |
| <i>Acetivibrio cellulolyticus</i> CD2            | dnd  |
| <i>Acetobacter aceti</i> NBRC 14818              | dnd  |
| <i>Acidobacterium capsulatum</i> ATCC 51196      | dnd  |
| <i>Acinetobacter guillouiae</i> CIP 63.46        | dnd  |
| <i>Acinetobacter guillouiae</i> KCTC 23200       | dnd  |
| <i>Acinetobacter guillouiae</i> MSP4-18          | dnd  |
| <i>Actinomadura atramentaria</i> DSM 43919       | dnd  |
| <i>Agrobacterium</i> sp. 10MFColl.1              | dnd  |

|                                                                      |            |
|----------------------------------------------------------------------|------------|
| <i>alpha proteobacterium</i> HIMB5                                   | <i>dnd</i> |
| <i>Amycolatopsis halophila</i> YIM 93223                             | <i>dnd</i> |
| <i>Amycolatopsis japonica</i> MG417-CF17                             | <i>dnd</i> |
| <i>Amycolatopsis jejuensis</i> NRRL B-24427                          | <i>dnd</i> |
| <i>Amycolatopsis orientalis</i> DSM 43388                            | <i>dnd</i> |
| <i>Anabaena cylindrica</i> PCC 7122                                  | <i>dnd</i> |
| <i>Anabaena</i> sp. 90                                               | <i>dnd</i> |
| <i>Anabaena</i> sp. PCC 7108                                         | <i>dnd</i> |
| <i>Anabaena variabilis</i> ATCC 29413                                | <i>dnd</i> |
| <i>Aneurinibacillus migulanus nagano</i>                             | <i>dnd</i> |
| <i>Anoxybacillus flavithermus</i> AK1                                | <i>dnd</i> |
| <i>Anoxybacillus flavithermus</i> subsp. <i>yunnanensis</i> str. E13 | <i>dnd</i> |
| <i>Anoxybacillus</i> sp. KU2-6(11)                                   | <i>dnd</i> |
| <i>Aphanizomenon flos-aquae</i> NIES-81                              | <i>dnd</i> |
| <i>Aphanocapsa montana</i> BDHKU210001                               | <i>dnd</i> |
| <i>Arthrospira</i> sp. TJSD091                                       | <i>dnd</i> |
| <i>Asticcacaulis</i> sp. AC466                                       | <i>dnd</i> |
| <i>Bacillus cereus</i> SDA KA 96                                     | <i>dnd</i> |
| <i>Bacillus okhensis</i> Kh10-101                                    | <i>dnd</i> |
| <i>Bacillus thuringiensis</i> HD1011                                 | <i>dnd</i> |
| <i>Bacteroides faecis</i> MAJ27                                      | <i>dnd</i> |
| <i>Bacteroides finegoldii</i> CL09T03C10                             | <i>dnd</i> |
| <i>Bacteroides fragilis</i> str. 2-F-2 #4                            | <i>dnd</i> |
| <i>Bacteroides fragilis</i> str. 2-F-2 #5                            | <i>dnd</i> |
| <i>Bacteroides fragilis</i> str. 2-F-2 #7                            | <i>dnd</i> |
| <i>Bacteroides</i> sp. 2_1_33B                                       | <i>dnd</i> |
| <i>Bacteroides vulgatus</i> dnLKV7                                   | <i>dnd</i> |
| <i>Bacteroides xylanisolvens</i> XB1A                                | <i>dnd</i> |
| <i>Bacteroidetes bacterium</i> JGI 0000119-L22                       | <i>dnd</i> |

|                                               |            |
|-----------------------------------------------|------------|
| <i>Beggiatoa</i> sp. PS                       | <i>dnd</i> |
| <i>Belliella baltica</i> DSM 15883            | <i>dnd</i> |
| <i>Burkholderia ambifaria</i> MC40-6          | <i>dnd</i> |
| <i>Burkholderia contaminans</i> FFH2055       | <i>dnd</i> |
| <i>Burkholderia pseudomallei</i> 12-40        | <i>dnd</i> |
| <i>Burkholderia pseudomallei</i> 15-10        | <i>dnd</i> |
| <i>Burkholderia pseudomallei</i> 153          | <i>dnd</i> |
| <i>Burkholderia pseudomallei</i> 15-40        | <i>dnd</i> |
| <i>Burkholderia pseudomallei</i> 17           | <i>dnd</i> |
| <i>Burkholderia pseudomallei</i> 33           | <i>dnd</i> |
| <i>Burkholderia pseudomallei</i> 4033-10      | <i>dnd</i> |
| <i>Burkholderia pseudomallei</i> 4044-138     | <i>dnd</i> |
| <i>Burkholderia pseudomallei</i> 4094-0081    | <i>dnd</i> |
| <i>Burkholderia pseudomallei</i> 48           | <i>dnd</i> |
| <i>Burkholderia pseudomallei</i> 54           | <i>dnd</i> |
| <i>Burkholderia pseudomallei</i> AH1          | <i>dnd</i> |
| <i>Burkholderia pseudomallei</i> Bp22         | <i>dnd</i> |
| <i>Burkholderia pseudomallei</i> D7 3230-3018 | <i>dnd</i> |
| <i>Burkholderia pseudomallei</i> DR08726/01   | <i>dnd</i> |
| <i>Burkholderia pseudomallei</i> I6 4043-3096 | <i>dnd</i> |
| <i>Burkholderia pseudomallei</i> MSHR1029     | <i>dnd</i> |
| <i>Burkholderia pseudomallei</i> MSHR1328     | <i>dnd</i> |
| <i>Burkholderia pseudomallei</i> MSHR1357     | <i>dnd</i> |
| <i>Burkholderia pseudomallei</i> MSHR4378     | <i>dnd</i> |
| <i>Burkholderia pseudomallei</i> MSHR5569     | <i>dnd</i> |
| <i>Burkholderia pseudomallei</i> QCMRI_BP18   | <i>dnd</i> |
| <i>Burkholderia pseudomallei</i> SW1          | <i>dnd</i> |
| <i>Burkholderia pseudomallei</i> SW9          | <i>dnd</i> |
| <i>Burkholderia pseudomallei</i> TSV 48       | <i>dnd</i> |

|                                                  |     |
|--------------------------------------------------|-----|
| <i>Burkholderiaceae bacterium</i> 16             | dnd |
| <i>Butyrivibrio</i> sp. AE3006                   | dnd |
| <i>Calothrix</i> sp. PCC 7103                    | dnd |
| <i>Calothrix</i> sp. PCC 7507                    | dnd |
| <i>Candidatus Magnetoovum chiemensis</i> CS-04   | dnd |
| <i>Candidatus Nitrosopumilus salaria</i> BD31    | dnd |
| <i>Candidatus Pelagibacter ubique</i> HTCC1002   | dnd |
| <i>Candidatus Schmidhempelia bombi</i> str. Bimp | dnd |
| <i>Candidatus Thiomargarita nelsonii</i>         | dnd |
| <i>Caulobacter</i> sp. AP07                      | dnd |
| <i>Chelativorans</i> sp. BNC1                    | dnd |
| <i>Chromobacterium haemolyticum</i> T124         | dnd |
| <i>Chromobacterium subtsugae</i> F49             | dnd |
| <i>Chroococcales cyanobacterium</i> CENA595      | dnd |
| <i>Chroococcidiopsis thermalis</i> PCC 7203      | dnd |
| <i>Chryseobacterium</i> sp. OV259                | dnd |
| <i>Citrobacter koseri</i> ATCC BAA-895           | dnd |
| <i>Clostridiaceae bacterium</i> MS3              | dnd |
| <i>Clostridiales bacterium</i> VE202-06          | dnd |
| <i>Clostridium beijerinckii</i> 59B              | dnd |
| <i>Clostridium beijerinckii</i> NCIMB 14988      | dnd |
| <i>Clostridium novyi</i> A str. 4552             | dnd |
| <i>Clostridium novyi</i> A str. GD211209         | dnd |
| <i>Clostridium sporogenes</i> CDC23284           | dnd |
| <i>Coleofasciculus chthonoplastes</i> PCC 7420   | dnd |
| <i>Comamonas testosteroni</i> D4                 | dnd |
| <i>Crinalium epipsammum</i> PCC 9333             | dnd |
| <i>Crocospaera watsonii</i> WH 0003              | dnd |
| <i>Crocospaera watsonii</i> WH 0005              | dnd |

|                                                   |     |
|---------------------------------------------------|-----|
| <i>Crocospaera watsonii</i> WH 0401               | dnd |
| <i>Crocospaera watsonii</i> WH 0402               | dnd |
| <i>Crocospaera watsonii</i> WH 8501               | dnd |
| <i>cyanobacterium</i> PCC 7702                    | dnd |
| <i>Cyanothece</i> sp. ATCC 51142                  | dnd |
| <i>Cyanothece</i> sp. ATCC 51472                  | dnd |
| <i>Cyanothece</i> sp. CCY0110                     | dnd |
| <i>Cyanothece</i> sp. PCC 7424                    | dnd |
| <i>Cyanothece</i> sp. PCC 7822                    | dnd |
| <i>Cyanothece</i> sp. PCC 8801                    | dnd |
| <i>Cyanothece</i> sp. PCC 8802                    | dnd |
| <i>Cyclobacteriaceae bacterium</i> AK24           | dnd |
| <i>Cylindrospermopsis raciborskii</i> CS-505      | dnd |
| <i>Cylindrospermum stagnale</i> PCC 7417          | dnd |
| <i>Dehalobacter</i> sp. FTH1                      | dnd |
| <i>Desulfatibacillum alkenivorans</i> AK-01       | dnd |
| <i>Desulfatirhabdium butyrativorans</i> DSM 18734 | dnd |
| <i>Desulfonatronum thioautotrophicum</i> ASO4-1   | dnd |
| <i>Desulfospira joergensenii</i> DSM 10085        | dnd |
| <i>Desulfovibrio africanus</i> str. Walvis Bay    | dnd |
| <i>Desulfovibrio cf. magneticus</i> IFRC170       | dnd |
| <i>Desulfovibrio inopinatus</i> DSM 10711         | dnd |
| <i>Desulfovibrio oxyclinae</i> DSM 11498          | dnd |
| <i>Dickeya dadantii</i> 3937                      | dnd |
| <i>Dolichospermum circinale</i> AWQC131C          | dnd |
| <i>Dolichospermum circinale</i> AWQC310F          | dnd |
| <i>Enterobacter asburiae</i> LF7a                 | dnd |
| <i>Enterobacter cloacae</i> FDA_MicroDB_70        | dnd |
| <i>Enterobacter cloacae</i> FDAARGOS_68           | dnd |

|                                                        |     |
|--------------------------------------------------------|-----|
| <i>Enterobacter cloacae</i> GN02767                    | dnd |
| <i>Enterobacter cloacae subsp. cloacae</i> NCTC 9394   | dnd |
| <i>Enterobacter cloacae subsp. cloacae</i> WCHECI-1060 | dnd |
| <i>Enterococcus gallinarum</i> EGD-AAK12               | dnd |
| <i>Escherichia coli</i> PCN061                         | dnd |
| <i>Escherichia coli</i> upec-284                       | dnd |
| <i>Eubacterium brachy</i> ATCC 33089                   | dnd |
| <i>Eubacterium plexicaudatum</i> ASF492                | dnd |
| <i>Eubacterium ramulus</i> ATCC 29099                  | dnd |
| <i>Firmicutes bacterium</i> ASF500                     | dnd |
| <i>Firmicutes bacterium</i> CAG:270                    | dnd |
| <i>Fischerella muscicola</i> SAG 1427-1 = PCC 73103    | dnd |
| <i>Fischerella</i> sp. JSC-11                          | dnd |
| <i>Fischerella</i> sp. PCC 9339                        | dnd |
| <i>Fischerella</i> sp. PCC 9431                        | dnd |
| <i>Fischerella</i> sp. PCC 9605                        | dnd |
| <i>Fischerella thermalis</i> PCC 7521                  | dnd |
| <i>Flavobacterium indicum</i> GPTSA100-9 = DSM 17447   | dnd |
| <i>Flavobacterium</i> sp. 316                          | dnd |
| <i>Flexibacter litoralis</i> DSM 6794                  | dnd |
| <i>gamma proteobacterium</i> NOR5-3                    | dnd |
| <i>gamma proteobacterium</i> WG36                      | dnd |
| <i>Geminocystis</i> sp. NIES-3708                      | dnd |
| <i>Geminocystis</i> sp. NIES-3709                      | dnd |
| <i>Geobacillus kaustophilus</i> Et2/3                  | dnd |
| <i>Geobacillus</i> sp. GHH01                           | dnd |
| <i>Geobacillus stearothermophilus</i> NUB3621          | dnd |
| <i>Geobacter bremensis</i> R1                          | dnd |
| <i>Geobacter uraniireducens</i> Rf4                    | dnd |



|                                                            |            |
|------------------------------------------------------------|------------|
| <i>Gloeocapsa</i> sp. PCC 7428                             | <i>dnd</i> |
| <i>Gordonia sputi</i> NBRC 100414                          | <i>dnd</i> |
| <i>Hassallia byssoidea</i> VB512170                        | <i>dnd</i> |
| <i>Hyphomonas oceanitis</i> SCH89                          | <i>dnd</i> |
| <i>Idiomarina</i> sp. 28-8                                 | <i>dnd</i> |
| <i>Jiangella alkaliphila</i> KCTC 19222                    | <i>dnd</i> |
| <i>Kamptonema formosum</i> PCC 6407                        | <i>dnd</i> |
| <i>Kandleria vitulina</i> WCE2011                          | <i>dnd</i> |
| <i>Klebsiella oxytoca</i> CH2                              | <i>dnd</i> |
| <i>Kordia algicida</i> OT-1                                | <i>dnd</i> |
| <i>Lachnospiraceae bacterium</i> AC2012                    | <i>dnd</i> |
| <i>Lachnospiraceae bacterium</i> FE2018                    | <i>dnd</i> |
| <i>Lachnospiraceae bacterium</i> oral taxon 082 str. F0431 | <i>dnd</i> |
| <i>Lebetimonas</i> sp. JH369                               | <i>dnd</i> |
| <i>Lebetimonas</i> sp. JS085                               | <i>dnd</i> |
| <i>Lebetimonas</i> sp. JS170                               | <i>dnd</i> |
| <i>Leptolyngbya</i> sp. JSC-1                              | <i>dnd</i> |
| <i>Leptolyngbya</i> sp. KIOST-1                            | <i>dnd</i> |
| <i>Leptolyngbya</i> sp. PCC 6406                           | <i>dnd</i> |
| <i>Limnoraphis robusta</i> CS-951                          | <i>dnd</i> |
| <i>Marinobacter</i> sp. EN3                                | <i>dnd</i> |
| <i>Mastigocladopsis repens</i> PCC 10914                   | <i>dnd</i> |
| <i>Mastigocladus laminosus</i> UU774                       | <i>dnd</i> |
| <i>Mesonia mobilis</i> DSM 19841                           | <i>dnd</i> |
| <i>Mesorhizobium amorphae</i> CCNWGS0123                   | <i>dnd</i> |
| <i>Mesorhizobium</i> sp. WSM3224                           | <i>dnd</i> |
| <i>Methanoregula boonei</i> 6A8                            | <i>dnd</i> |
| <i>Methanosarcina mazei</i> 1.H.A.1A.1                     | <i>dnd</i> |
| <i>Methanosarcina mazei</i> 1.H.A.1A.3                     | <i>dnd</i> |

|                                          |     |
|------------------------------------------|-----|
| <i>Methanosarcina mazei</i> 1.H.A.1A.6   | dnd |
| <i>Methanosarcina mazei</i> 1.H.A.2.3    | dnd |
| <i>Methanosarcina mazei</i> 1.H.A.2.7    | dnd |
| <i>Methanosarcina mazei</i> 1.H.A.2.8    | dnd |
| <i>Methanosarcina mazei</i> 1.H.M.0.1    | dnd |
| <i>Methanosarcina mazei</i> 1.H.M.1A.1   | dnd |
| <i>Methanosarcina mazei</i> 1.H.M.1A.2   | dnd |
| <i>Methanosarcina mazei</i> 1.H.M.1A.3   | dnd |
| <i>Methanosarcina mazei</i> 1.H.M.2.2    | dnd |
| <i>Methanosarcina mazei</i> 1.H.M.2.3    | dnd |
| <i>Methanosarcina mazei</i> 1.H.M.2.4    | dnd |
| <i>Methanosarcina mazei</i> 1.H.T.2.1    | dnd |
| <i>Methanosarcina mazei</i> 1.H.T.2.3    | dnd |
| <i>Methanosarcina mazei</i> 1.H.T.2.5    | dnd |
| <i>Methanosarcina mazei</i> 2.F.A.2.3    | dnd |
| <i>Methanosarcina mazei</i> 3.F.A.1A.1   | dnd |
| <i>Methanosarcina mazei</i> 3.F.A.1B.1   | dnd |
| <i>Methanosphaerula palustris</i> E1-9c  | dnd |
| <i>Microchaete</i> sp. PCC 7126          | dnd |
| <i>Microcoleus</i> sp. PCC 7113          | dnd |
| <i>Microcoleus vaginatus</i> FGP-2       | dnd |
| <i>Moorea producens</i> 3L               | dnd |
| <i>Moorella glycerini</i> NMP            | dnd |
| <i>Mycobacterium abscessus</i> 1948      | dnd |
| <i>Mycobacterium abscessus</i> 3A-0119-R | dnd |
| <i>Mycobacterium abscessus</i> 3A-0122-R | dnd |
| <i>Mycobacterium abscessus</i> 3A-0122-S | dnd |
| <i>Mycobacterium abscessus</i> 3A-0731   | dnd |
| <i>Mycobacterium abscessus</i> 3A-0810-R | dnd |

|                                                        |     |
|--------------------------------------------------------|-----|
| <i>Mycobacterium abscessus</i> 3A-0930-R               | dnd |
| <i>Mycobacterium abscessus</i> 3A-0930-S               | dnd |
| <i>Mycobacterium abscessus</i> 6G-0125-R               | dnd |
| <i>Mycobacterium abscessus</i> 6G-0125-S               | dnd |
| <i>Mycobacterium abscessus</i> 6G-0212                 | dnd |
| <i>Mycobacterium abscessus</i> 6G-0728-R               | dnd |
| <i>Mycobacterium abscessus</i> 6G-0728-S               | dnd |
| <i>Mycobacterium abscessus</i> 6G-1108                 | dnd |
| <i>Mycobacterium abscessus</i> ATCC 19977              | dnd |
| <i>Mycobacterium abscessus</i> MAB_110811_2726         | dnd |
| <i>Mycobacterium abscessus</i> PAP001                  | dnd |
| <i>Mycobacterium abscessus</i> PAP002                  | dnd |
| <i>Mycobacterium abscessus</i> PAP004                  | dnd |
| <i>Mycobacterium abscessus</i> PAP020                  | dnd |
| <i>Mycobacterium abscessus</i> PAP077                  | dnd |
| <i>Mycobacterium abscessus</i> subsp. bolletii 103     | dnd |
| <i>Mycobacterium abscessus</i> subsp. bolletii MA 1948 | dnd |
| <i>Mycobacterium abscessus</i> subsp. bolletii MC1518  | dnd |
| <i>Mycobacterium abscessus</i> UC95                    | dnd |
| <i>Mycobacterium abscessus</i> V06705                  | dnd |
| <i>Mycobacterium chelonae</i> 1518                     | dnd |
| <i>Mycobacterium fortuitum</i> Z58                     | dnd |
| <i>Mycobacterium kansasii</i> Z61                      | dnd |
| <i>Mycobacterium parascrofulaceum</i> ATCC BAA-614     | dnd |
| <i>Mycobacterium phlei</i> RIVM601174                  | dnd |
| <i>Mycobacterium vaccae</i> ATCC 25954                 | dnd |
| <i>Natronorubrum bangense</i> JCM 10635                | dnd |
| <i>Nocardia brasiliensis</i> ATCC 700358               | dnd |
| <i>Nocardiopsis</i> sp. CNS639                         | dnd |

|                                                             |            |
|-------------------------------------------------------------|------------|
| <i>Nocardiopsis</i> sp. CNT312                              | <i>dnd</i> |
| <i>Nocardiopsis synnemataformans</i> DSM 44143              | <i>dnd</i> |
| <i>Nodosilinea nodulosa</i> PCC 7104                        | <i>dnd</i> |
| <i>Nodularia spumigena</i> CCY9414                          | <i>dnd</i> |
| <i>Nostoc punctiforme</i> PCC 73102                         | <i>dnd</i> |
| <i>Nostoc</i> sp. PCC 7120                                  | <i>dnd</i> |
| <i>Oleispira antarctica</i> RB-8                            | <i>dnd</i> |
| <i>Oscillatoria acuminata</i> PCC 6304                      | <i>dnd</i> |
| <i>Oscillatoria nigro-viridis</i> PCC 7112                  | <i>dnd</i> |
| <i>Oscillatoria</i> sp. PCC 10802                           | <i>dnd</i> |
| <i>Oscillospiraceae bacterium</i> VE202-24                  | <i>dnd</i> |
| <i>Parabacteroides goldsteinii</i> CL02T12C30               | <i>dnd</i> |
| <i>Parabacteroides goldsteinii</i> DSM 19448 = WAL 12034    | <i>dnd</i> |
| <i>Paraprevotella xylaniphila</i> YIT 11841                 | <i>dnd</i> |
| <i>Pectobacterium carotovorum subsp. Brasiliense</i> YC D52 | <i>dnd</i> |
| <i>Peptoclostridium difficile</i> 342                       | <i>dnd</i> |
| <i>Peptoclostridium difficile</i> 6041                      | <i>dnd</i> |
| <i>Peptoclostridium difficile</i> ATCC 9689 = DSM 1296      | <i>dnd</i> |
| <i>Peptoclostridium difficile</i> CD129                     | <i>dnd</i> |
| <i>Peptoclostridium difficile</i> CD131                     | <i>dnd</i> |
| <i>Peptoclostridium difficile</i> CD149                     | <i>dnd</i> |
| <i>Peptoclostridium difficile</i> CD166                     | <i>dnd</i> |
| <i>Peptoclostridium difficile</i> CD181                     | <i>dnd</i> |
| <i>Peptoclostridium difficile</i> CD200                     | <i>dnd</i> |
| <i>Peptoclostridium difficile</i> CD22                      | <i>dnd</i> |
| <i>Peptoclostridium difficile</i> CD40                      | <i>dnd</i> |
| <i>Peptoclostridium difficile</i> CD43                      | <i>dnd</i> |
| <i>Peptoclostridium difficile</i> CD47                      | <i>dnd</i> |
| <i>Peptoclostridium difficile</i> CD86                      | <i>dnd</i> |

|                                              |     |
|----------------------------------------------|-----|
| <i>Peptoclostridium difficile</i> CD92       | dnd |
| <i>Peptoclostridium difficile</i> DA00128    | dnd |
| <i>Peptoclostridium difficile</i> DA00167    | dnd |
| <i>Peptoclostridium difficile</i> DA00238    | dnd |
| <i>Peptoclostridium difficile</i> DA00273    | dnd |
| <i>Peptoclostridium difficile</i> DA00305    | dnd |
| <i>Peptoclostridium difficile</i> DA00307    | dnd |
| <i>Peptoclostridium difficile</i> E23        | dnd |
| <i>Peptoclostridium difficile</i> F152       | dnd |
| <i>Peptoclostridium difficile</i> P1         | dnd |
| <i>Peptoclostridium difficile</i> P6         | dnd |
| <i>Peptoclostridium difficile</i> P69        | dnd |
| <i>Peptoclostridium difficile</i> P8         | dnd |
| <i>Peptoclostridium difficile</i> QCD-63q42  | dnd |
| <i>Peptoclostridium difficile</i> T10        | dnd |
| <i>Peptoclostridium difficile</i> T14        | dnd |
| <i>Peptococcaceae bacterium</i> BRH_c4a      | dnd |
| <i>Planktothrix agardhii</i> NIVA-CYA 126/8  | dnd |
| <i>Planktothrix agardhii</i> NIVA-CYA 15     | dnd |
| <i>Planktothrix agardhii</i> NIVA-CYA 34     | dnd |
| <i>Planktothrix agardhii</i> NIVA-CYA 56/3   | dnd |
| <i>Planktothrix mougeotii</i> NIVA-CYA 405   | dnd |
| <i>Planktothrix prolifica</i> NIVA-CYA 406   | dnd |
| <i>Planktothrix prolifica</i> NIVA-CYA 540   | dnd |
| <i>Planktothrix prolifica</i> NIVA-CYA 98    | dnd |
| <i>Planktothrix rubescens</i> NIVA-CYA 407   | dnd |
| <i>Polaribacter</i> sp. Hel_I_88             | dnd |
| <i>Porphyrobacter</i> sp. HL-46              | dnd |
| <i>Porphyromonadaceae bacterium</i> ING2-E5B | dnd |

|                                                        |     |
|--------------------------------------------------------|-----|
| <i>Prevotella amnii</i> CRIS 21A-A                     | dnd |
| <i>Prevotella bivia</i> DSM 20514                      | dnd |
| <i>Prevotella histicola</i> JCM 15637 = DNF00424       | dnd |
| <i>Proteus mirabilis</i> PR03                          | dnd |
| <i>Pseudanabaena biceps</i> PCC 7429                   | dnd |
| <i>Pseudoalteromonas</i> sp. BSi20480                  | dnd |
| <i>Pseudomonas aeruginosa</i> DK2                      | dnd |
| <i>Pseudomonas fluorescens</i> Pf0-1                   | dnd |
| <i>Pseudomonas</i> sp. BAY1663                         | dnd |
| <i>Pseudomonas</i> sp. GM16                            | dnd |
| <i>Pseudomonas</i> sp. GM24                            | dnd |
| <i>Pseudomonas stutzeri</i> BAL361                     | dnd |
| <i>Pseudomonas viridiflava</i> TA043                   | dnd |
| <i>Raphidiopsis brookii</i> D9                         | dnd |
| <i>Rhizobium etli</i> CNPAF512                         | dnd |
| <i>Rhizobium larrymoorei</i> ATCC 51759                | dnd |
| <i>Rhizobium leguminosarum</i> bv. trifolii WSM1689    | dnd |
| <i>Rhizobium mesoamericanum</i> STM6155                | dnd |
| <i>Rhodococcus fascians</i> A78                        | dnd |
| <i>Riemerella anatipestifer</i> 153                    | dnd |
| <i>Riemerella anatipestifer</i> ATCC 11845 = DSM 15868 | dnd |
| <i>Riemerella anatipestifer</i> RA-CH-2                | dnd |
| <i>Riemerella anatipestifer</i> RA-SG                  | dnd |
| <i>Riemerella anatipestifer</i> RA-YM                  | dnd |
| <i>Riemerella anatipestifer</i> Yb2                    | dnd |
| <i>Rivularia</i> sp. PCC 7116                          | dnd |
| <i>Roseburia inulinivorans</i> CAG:15                  | dnd |
| <i>Roseobacter denitrificans</i> OCh 114               | dnd |
| <i>Ruminococcus albus</i> SY3                          | dnd |

|                                                                                                  |     |
|--------------------------------------------------------------------------------------------------|-----|
| <i>Ruminococcus flavefaciens</i> 17                                                              | dnd |
| <i>Salinispora pacifica</i> CNR894                                                               | dnd |
| <i>Salinispora pacifica</i> CNY330                                                               | dnd |
| <i>Salmonella enterica</i> subsp. <i>diarizonae</i> serovar<br>60:r:e,n,x,z15 str. 01-0170       | dnd |
| <i>Salmonella enterica</i> subsp. <i>enterica</i> serovar I 8,20:-:z6<br>CVM N43471              | dnd |
| <i>Salmonella enterica</i> subsp. <i>enterica</i> serovar <i>Infantis</i> str.<br>SARB27         | dnd |
| <i>Salmonella enterica</i> subsp. <i>enterica</i> serovar <i>Kentucky</i><br>str. 0253           | dnd |
| <i>Salmonella enterica</i> subsp. <i>enterica</i> serovar <i>Kentucky</i><br>str. 13562          | dnd |
| <i>Salmonella enterica</i> subsp. <i>enterica</i> serovar <i>Kentucky</i><br>str. 20793          | dnd |
| <i>Salmonella enterica</i> subsp. <i>enterica</i> serovar <i>Kentucky</i><br>str. 22694          | dnd |
| <i>Salmonella enterica</i> subsp. <i>enterica</i> serovar <i>Kentucky</i><br>str. 29166          | dnd |
| <i>Salmonella enterica</i> subsp. <i>enterica</i> serovar <i>Kentucky</i><br>str. 29439          | dnd |
| <i>Salmonella enterica</i> subsp. <i>enterica</i> serovar <i>Kentucky</i><br>str. 5349           | dnd |
| <i>Salmonella enterica</i> subsp. <i>enterica</i> serovar <i>Kentucky</i><br>str. ABB07-SB3057-2 | dnd |
| <i>Salmonella enterica</i> subsp. <i>enterica</i> serovar <i>Kentucky</i><br>str. ABB1087-1      | dnd |
| <i>Salmonella enterica</i> subsp. <i>enterica</i> serovar <i>Kentucky</i><br>str. ABBSB1008-2    | dnd |
| <i>Salmonella enterica</i> subsp. <i>enterica</i> serovar <i>Kentucky</i><br>str. CDC 191        | dnd |
| <i>Salmonella enterica</i> subsp. <i>enterica</i> serovar <i>Kentucky</i><br>str. CVM N43447     | dnd |
| <i>Salmonella enterica</i> subsp. <i>enterica</i> serovar <i>Kentucky</i><br>str. CVM N43448     | dnd |

|                                                                                              |            |
|----------------------------------------------------------------------------------------------|------------|
| <i>Salmonella enterica</i> subsp. <i>enterica</i> serovar <i>Kentucky</i><br>str. CVM N43450 | <i>dnd</i> |
| <i>Salmonella enterica</i> subsp. <i>enterica</i> serovar <i>Kentucky</i><br>str. CVM N43455 | <i>dnd</i> |
| <i>Salmonella enterica</i> subsp. <i>enterica</i> serovar <i>Kentucky</i><br>str. CVM N43465 | <i>dnd</i> |
| <i>Salmonella enterica</i> subsp. <i>enterica</i> serovar <i>Kentucky</i><br>str. CVM N43466 | <i>dnd</i> |
| <i>Salmonella enterica</i> subsp. <i>enterica</i> serovar <i>Kentucky</i><br>str. CVM N43478 | <i>dnd</i> |
| <i>Salmonella enterica</i> subsp. <i>enterica</i> serovar <i>Kentucky</i><br>str. CVM N43820 | <i>dnd</i> |
| <i>Salmonella enterica</i> subsp. <i>enterica</i> serovar <i>Kentucky</i><br>str. CVM N43835 | <i>dnd</i> |
| <i>Salmonella enterica</i> subsp. <i>enterica</i> serovar <i>Kentucky</i><br>str. CVM N44708 | <i>dnd</i> |
| <i>Salmonella enterica</i> subsp. <i>enterica</i> serovar <i>Kentucky</i><br>str. CVM N45412 | <i>dnd</i> |
| <i>Salmonella enterica</i> subsp. <i>enterica</i> serovar <i>Kentucky</i><br>str. CVM N45934 | <i>dnd</i> |
| <i>Salmonella enterica</i> subsp. <i>enterica</i> serovar <i>Kentucky</i><br>str. CVM N45937 | <i>dnd</i> |
| <i>Salmonella enterica</i> subsp. <i>enterica</i> serovar <i>Kentucky</i><br>str. CVM N45939 | <i>dnd</i> |
| <i>Salmonella enterica</i> subsp. <i>enterica</i> serovar <i>Kentucky</i><br>str. CVM N45944 | <i>dnd</i> |
| <i>Salmonella enterica</i> subsp. <i>enterica</i> serovar <i>Kentucky</i><br>str. CVM N46820 | <i>dnd</i> |
| <i>Salmonella enterica</i> subsp. <i>enterica</i> serovar <i>Kentucky</i><br>str. CVM N46849 | <i>dnd</i> |
| <i>Salmonella enterica</i> subsp. <i>enterica</i> serovar <i>Kentucky</i><br>str. CVM N46857 | <i>dnd</i> |
| <i>Salmonella enterica</i> subsp. <i>enterica</i> serovar <i>Kentucky</i><br>str. CVM N47718 | <i>dnd</i> |



|                                                                             |            |
|-----------------------------------------------------------------------------|------------|
| <i>Salmonella enterica subsp. enterica serovar Kentucky str. CVM N47720</i> | <i>dnd</i> |
| <i>Salmonella enterica subsp. enterica serovar Kentucky str. CVM N47721</i> | <i>dnd</i> |
| <i>Salmonella enterica subsp. enterica serovar Kentucky str. CVM N47723</i> | <i>dnd</i> |
| <i>Salmonella enterica subsp. enterica serovar Kentucky str. CVM N47729</i> | <i>dnd</i> |
| <i>Salmonella enterica subsp. enterica serovar Kentucky str. CVM N47730</i> | <i>dnd</i> |
| <i>Salmonella enterica subsp. enterica serovar Kentucky str. CVM N48688</i> | <i>dnd</i> |
| <i>Salmonella enterica subsp. enterica serovar Kentucky str. CVM N48707</i> | <i>dnd</i> |
| <i>Salmonella enterica subsp. enterica serovar Kentucky str. CVM N48710</i> | <i>dnd</i> |
| <i>Salmonella enterica subsp. enterica serovar Kentucky str. CVM N48711</i> | <i>dnd</i> |
| <i>Salmonella enterica subsp. enterica serovar Kentucky str. CVM N50419</i> | <i>dnd</i> |
| <i>Salmonella enterica subsp. enterica serovar Kentucky str. CVM N50421</i> | <i>dnd</i> |
| <i>Salmonella enterica subsp. enterica serovar Kentucky str. CVM N50429</i> | <i>dnd</i> |
| <i>Salmonella enterica subsp. enterica serovar Kentucky str. CVM N50435</i> | <i>dnd</i> |
| <i>Salmonella enterica subsp. enterica serovar Kentucky str. CVM N50437</i> | <i>dnd</i> |
| <i>Salmonella enterica subsp. enterica serovar Kentucky str. CVM N51241</i> | <i>dnd</i> |
| <i>Salmonella enterica subsp. enterica serovar Kentucky str. CVM N51249</i> | <i>dnd</i> |
| <i>Salmonella enterica subsp. enterica serovar Kentucky str. CVM N51252</i> | <i>dnd</i> |

|                                                                                              |     |
|----------------------------------------------------------------------------------------------|-----|
| <i>Salmonella enterica</i> subsp. <i>enterica</i> serovar <i>Kentucky</i><br>str. CVM N51256 | dnd |
| <i>Salmonella enterica</i> subsp. <i>enterica</i> serovar <i>Kentucky</i><br>str. CVM N51273 | dnd |
| <i>Salmonella enterica</i> subsp. <i>enterica</i> serovar <i>Kentucky</i><br>str. CVM N51277 | dnd |
| <i>Salmonella enterica</i> subsp. <i>enterica</i> serovar <i>Kentucky</i><br>str. CVM N51294 | dnd |
| <i>Salmonella enterica</i> subsp. <i>enterica</i> serovar <i>Kentucky</i><br>str. CVM N51313 | dnd |
| <i>Salmonella enterica</i> subsp. <i>enterica</i> serovar <i>Kentucky</i><br>str. CVM N51981 | dnd |
| <i>Salmonella enterica</i> subsp. <i>enterica</i> serovar <i>Kentucky</i><br>str. CVM N51982 | dnd |
| <i>Salmonella enterica</i> subsp. <i>enterica</i> serovar <i>Kentucky</i><br>str. CVM29188   | dnd |
| <i>Salmonella enterica</i> subsp. <i>enterica</i> serovar <i>Kentucky</i><br>str. N312       | dnd |
| <i>Salmonella enterica</i> subsp. <i>enterica</i> serovar <i>Kentucky</i><br>str. SALC-205-3 | dnd |
| <i>Salmonella enterica</i> subsp. <i>enterica</i> serovar <i>Ohio</i> CVM<br>str. N44711     | dnd |
| <i>Salmonella enterica</i> subsp. <i>enterica</i> serovar <i>Ohio</i> str.<br>CFSAN001079    | dnd |
| <i>Scytonema tolypothrichoides</i> VB-61278                                                  | dnd |
| <i>Selenomonas</i> sp. CM52                                                                  | dnd |
| <i>Silicibacter</i> sp. TrichCH4B                                                            | dnd |
| <i>Sinorhizobium meliloti</i> 4H41                                                           | dnd |
| <i>Streptomyces avermitilis</i> MA-4680 = NBRC 14893                                         | dnd |
| <i>Streptomyces griseus</i> S4-7                                                             | dnd |
| <i>Streptomyces griseus</i> subsp. <i>griseus</i> NRRL WC-3480                               | dnd |
| <i>Streptomyces iakyrus</i> NRRL ISP-5482                                                    | dnd |
| <i>Streptomyces lividans</i> 1326                                                            | dnd |

|                                                                       |            |
|-----------------------------------------------------------------------|------------|
| <i>Streptomyces lividans</i> 66                                       | <i>dnd</i> |
| <i>Streptomyces lividans</i> TK24                                     | <i>dnd</i> |
| <i>Streptomyces rimosus</i> subsp. <i>rimosus</i> NRRL WC-3929        | <i>dnd</i> |
| <i>Streptomyces rimosus</i> subsp. <i>rimosus</i> NRRL WC-3930        | <i>dnd</i> |
| <i>Streptomyces roseochromogenus</i> subsp. <i>oscitans</i> DS 12.976 | <i>dnd</i> |
| <i>Streptomyces scabrisporus</i> DSM 41855                            | <i>dnd</i> |
| <i>Streptomyces</i> sp. 769                                           | <i>dnd</i> |
| <i>Streptomyces</i> sp. CNT318                                        | <i>dnd</i> |
| <i>Streptomyces</i> sp. FxanaD5                                       | <i>dnd</i> |
| <i>Streptomyces</i> sp. LaPpAH-202                                    | <i>dnd</i> |
| <i>Streptomyces</i> sp. NRRL F-2305                                   | <i>dnd</i> |
| <i>Streptomyces</i> sp. NRRL F-2580                                   | <i>dnd</i> |
| <i>Streptomyces</i> sp. NRRL F-5650                                   | <i>dnd</i> |
| <i>Streptomyces</i> sp. NRRL F-5702                                   | <i>dnd</i> |
| <i>Streptomyces</i> sp. WM6391                                        | <i>dnd</i> |
| <i>Streptomyces toyocaensis</i> NRRL 15009                            | <i>dnd</i> |
| <i>Subdoligranulum</i> sp. CAG:314                                    | <i>dnd</i> |
| <i>Sulfitobacter</i> sp. 20_GPM-1509m                                 | <i>dnd</i> |
| <i>Sulfuricella denitrificans</i> skB26                               | <i>dnd</i> |
| <i>Sulfurospirillum barnesii</i> SES-3                                | <i>dnd</i> |
| <i>Synechocystis</i> sp. PCC 7509                                     | <i>dnd</i> |
| <i>Tamlana sedimentorum</i> JCM 19808                                 | <i>dnd</i> |
| <i>Tenacibaculum</i> sp. 47A_GOM-205m                                 | <i>dnd</i> |
| <i>Teredinibacter turnerae</i> 1133Y.S.0a.04                          | <i>dnd</i> |
| <i>Teredinibacter turnerae</i> T8513                                  | <i>dnd</i> |
| <i>Thalassospira lucentensis</i> MCCC 1A00383 = DSM 14000             | <i>dnd</i> |
| <i>Thauera linaloolentis</i> 47Lol = DSM 12138                        | <i>dnd</i> |
| <i>Thermomonospora curvata</i> DSM 43183                              | <i>dnd</i> |

|                                                                         |     |
|-------------------------------------------------------------------------|-----|
| <i>Thermonema rossianum</i> DSM 10300                                   | dnd |
| <i>Thioalkalivibrio</i> sp. AKL3                                        | dnd |
| <i>Thioalkalivibrio</i> sp. AKL9                                        | dnd |
| <i>Thioflaviccoccus mobilis</i> 8321                                    | dnd |
| <i>Tolumonas auensis</i> DSM 9187                                       | dnd |
| <i>Tolyptothrix bouteillei</i> VB521301                                 | dnd |
| <i>Tolyptothrix campylonemoides</i> VB511288                            | dnd |
| <i>Tumebacillus flagellatus</i> GST4                                    | dnd |
| uncultured marine thaumarchaeote KM3_186_C08                            | dnd |
| <i>Vibrio campbellii</i> 602L                                           | dnd |
| <i>Vibrio metoecus</i> OP3H                                             | dnd |
| <i>Acinetobacter</i> sp. NIPH 2036                                      | dpt |
| <i>Bacillus cereus</i> AH1272                                           | dpt |
| <i>Bacillus cereus</i> AH1273                                           | dpt |
| <i>Bacillus cereus</i> B4147                                            | dpt |
| <i>Bacillus cereus</i> BAG5O-1                                          | dpt |
| <i>Bacillus cereus</i> BAG5X1-1                                         | dpt |
| <i>Bacillus cereus</i> BDRD-ST196                                       | dpt |
| <i>Bacillus cereus</i> F837/76                                          | dpt |
| <i>Bacillus cereus</i> HuA4-10                                          | dpt |
| <i>Bacillus cereus</i> m1293                                            | dpt |
| <i>Bacillus cereus</i> MM3                                              | dpt |
| <i>Bacillus cereus</i> VD078                                            | dpt |
| <i>Bacillus cereus</i> VDM022                                           | dpt |
| <i>Bacillus</i> sp. B14905                                              | dpt |
| <i>Bacillus</i> sp. FJAT-14578                                          | dpt |
| <i>Bacillus</i> sp. UNC322MFChir4.1                                     | dpt |
| <i>Bacillus thuringiensis</i> serovar <i>huazhongensis</i><br>BGSC 4BD1 | dpt |

|                                                               |     |
|---------------------------------------------------------------|-----|
| <i>Bacillus weihenstephanensis</i><br>NBRC 101238 = DSM 11821 | dpt |
| <i>Bacillus weihenstephanensis</i> WSBC 10204                 | dpt |
| <i>Butyrivibrio</i> sp. VCD2006                               | dpt |
| <i>Carnobacterium</i> sp. WN1359                              | dpt |
| <i>Clostridium</i> sp. CAG:221                                | dpt |
| <i>Clostridium</i> sp. CAG:265                                | dpt |
| <i>Cronobacter sakazakii</i> 680                              | dpt |
| <i>Cronobacter sakazakii</i> ATCC 29544                       | dpt |
| <i>Cronobacter sakazakii</i> NBRC 102416                      | dpt |
| <i>Escherichia coli</i> 1-176-05_S3_C1                        | dpt |
| <i>Exiguobacterium</i> sp. NG55                               | dpt |
| <i>Kurthia</i> sp. JC8E                                       | dpt |
| <i>Lactobacillus composti</i> DSM 18527 = JCM 14202           | dpt |
| <i>Lactobacillus plantarum</i> AG30                           | dpt |
| <i>Paraprevotella clara</i> YIT 11840                         | dpt |
| <i>Photobacterium angustum</i> ATCC 33977                     | dpt |
| <i>Photobacterium phosphoreum</i> ANT-2200                    | dpt |
| <i>Pontibacillus litoralis</i> JSM 072002                     | dpt |
| <i>Prevotella</i> sp. P5-125                                  | dpt |
| <i>Staphylococcus epidermidis</i> NIHLM001                    | dpt |
| <i>Staphylococcus epidermidis</i> NIHLM040                    | dpt |
| <i>Staphylococcus epidermidis</i> VCU036                      | dpt |
| <i>Staphylococcus simulans</i> ACS-120-V-Sch1                 | dpt |
| <i>Staphylococcus</i> sp. HGB0015                             | dpt |
| <i>Sulfurospirillum cavolei</i> NBRC 109482                   | dpt |
| <i>Vibrio parahaemolyticus</i> CFSAN007444                    | dpt |
| <i>Vibrio vulnificus</i> VVyb1(BT3)                           | dpt |
| <i>Viridibacillus arenosi</i> FSL R5-213                      | dpt |

|                                               |            |
|-----------------------------------------------|------------|
| <i>Weissella cibaria</i> AB3b                 | <i>dpt</i> |
| <i>Weissella cibaria</i> ff3PR                | <i>dpt</i> |
| <i>Weissella paramesenteroides</i> ATCC 33313 | <i>dpt</i> |
| <i>Yersinia mollaretii</i> 64/02              | <i>dpt</i> |
| <i>Yersinia pseudotuberculosis</i> MW109-2    | <i>dpt</i> |

---

**Supplementary Table 3**

Strains and Plasmids used in this study

| Strains and Plasmids                | Description                                                                                                                                                                | Reference or Source |
|-------------------------------------|----------------------------------------------------------------------------------------------------------------------------------------------------------------------------|---------------------|
| <b>Strains</b>                      |                                                                                                                                                                            |                     |
| Hpx <sup>-</sup> (LC106)            | As MG1655 plus $\Delta(katG17::Tn10)1$<br>$\Delta(katE12::Tn10)1 \Delta ahpCF' kan::'ahpF'$                                                                                | 19                  |
| MG1655                              | Wild type                                                                                                                                                                  | 19                  |
| Hpx <sup>-</sup> /Dnd <sup>+</sup>  | As Hpx <sup>-</sup> plus pJTU1238, Dnd phenotype positive, Amp <sup>r</sup>                                                                                                | This study          |
| Hpx <sup>-</sup> /dndC <sup>-</sup> | As Hpx <sup>-</sup> plus pJTU3527, Dnd phenotype negative, Amp <sup>r</sup>                                                                                                | This study          |
| Hpx <sup>-</sup> /dndD <sup>-</sup> | As Hpx <sup>-</sup> plus pJTU3528, Dnd phenotype negative, Amp <sup>r</sup>                                                                                                | This study          |
| Hpx <sup>-</sup> /dndE <sup>-</sup> | As Hpx <sup>-</sup> plus pJTU3529, Dnd phenotype negative, Amp <sup>r</sup>                                                                                                | This study          |
| <i>E. coli</i> WM3064               | thrB1004 pro thi rpsL hsdS lacZDM15 RP4-1360 $\Delta(araBAD)567 \Delta dapA1341::[erm pir(wt)]$                                                                            | 47                  |
| WP3                                 | Wild type of a deep-sea bacterium <i>Shewanella piezotolerans</i>                                                                                                          | lab stock           |
| WP3 $\Delta$ SW1                    | a phage-free mutant derived from WP3, Kan <sup>r</sup>                                                                                                                     | lab stock           |
| WP3NR                               | non-restricting and phage-free mutant derived from WP3                                                                                                                     | This study          |
| WP3NR/ Dnd <sup>+</sup>             | As WP3NR plus pSW2dnd, Dnd phenotype positive, Chl <sup>r</sup>                                                                                                            | This study          |
| WP3NR/ Dnd <sup>-</sup>             | As WP3NR plus pSW2, Dnd phenotype negative, Chl <sup>r</sup>                                                                                                               | This study          |
| <i>E. coli</i> DH10B                | Non-restricting host strain for gene cloning                                                                                                                               | 48                  |
| <b>Plasmids</b>                     |                                                                                                                                                                            |                     |
| pJTU1238                            | pBluescript II sk(+) derivative carrying a 6.7kb fragment of <i>dndBCDE</i> gene cluster from <i>S. enterica</i> Cerro 87, with <i>dnd</i> self-promoter, Amp <sup>r</sup> | 3                   |

|                        |                                                                                                |            |
|------------------------|------------------------------------------------------------------------------------------------|------------|
| pJTU3527               | A derivative of pJTU1238, <i>dndC</i> <sup>-</sup> , in-frame deletion, Amp <sup>r</sup>       | 18         |
| pJTU3528               | A derivative of pJTU1238, <i>dndD</i> <sup>-</sup> , in-frame deletion, Amp <sup>r</sup>       | 18         |
| pJTU3529               | A derivative of pJTU1238, <i>dndE</i> <sup>-</sup> , in-frame deletion, Amp <sup>r</sup>       | 18         |
| pBluescript II sk( + ) | E. coli cloning vector, bla, Bla, lacZ, orif1, ColE, Amp <sup>r</sup>                          | Fermentas  |
| pJTU3619               | <i>E.coli dndA</i> gene cloned in pet15b                                                       | 49         |
| pRE112                 | Allelic-exchange vector for gene mutation in WP3                                               | 50         |
| pRE112R1               | pRE112 containing the PCR fragment for deleting a restriction endonuclease gene <i>swp0009</i> | This study |
| pRE112R2               | pRE112 containing the PCR fragment for deleting a restriction endonuclease gene <i>swp840</i>  | This study |
| pRE112R3               | pRE112 containing the PCR fragment for deleting a restriction endonuclease gene <i>swp2190</i> | This study |
| pSW2                   | WP3 cloning vector, derivative from filamentous bacteriophage SW1, Chl <sup>r</sup>            | 51         |
| pSW2Dnd <sup>+</sup>   | pSW2 derivative carrying <i>dndA</i> from pJTU3619 and <i>dnd</i> gene cluster from pJTU1238.  | This study |

---
